# Supplementary material for: Cronobacter sakazakii, Cronobacter malonaticus, and Cronobacter dublinensis Genotyping Based on CRISPR Locus Diversity
Source: Front Microbiol. 2019 Aug 28;10:1989. doi: 10.3389/fmicb.2019.01989 (PMC6722223; doi:10.3389/fmicb.2019.01989)
Supplement: Supplementary file 6 [file Data_Sheet_6.XLSX]

## Sheet: Sheet1
Data Sheet 6. The dictionary of CRISPR spacers in C. dublinensis
Dictionary of CRISPR1 spacers				Dictionary of CRISPR2 spacers				Dictionary of CRISPR3 spacers				Dictionary of CRISPR6 spacers
key	AnnotatedSpacer	sequence		key	AnnotatedSpacer	sequence		key	AnnotatedSpacer	sequence		key	AnnotatedSpacer	sequence
1	dub1-1	TTCGACGGGCTATCTGCCGAAGAGGCGGAGCA		1	dub2-1	GCAACGTGGCCATAACAGGCGGCAGCCTGACC		1	dub3-1	ACTGACGTCTCCGGGCTTCGCCCTCCGCGATC		1	dub6-1	TTTCATTTTTCGCTTTTAGTGACGCGCTGATG
2	dub1-2	GCTTGAATCAGGCCATGCCCATGCTTGATAAA		2	dub2-2	ATCTGCAGGTAACAGGGCGCAGTCAAGCCACT		2	dub3-2	AAGCGGAATGGCTGTAAAGGGGTGCATACCGA		2	dub6-2	AGTGCGATTCGACTCGCGCGGCTTCTTCAATG
3	dub1-3	ACGAGTTTCGCGCGCGCATCCAGTTATCGCCG		3	dub2-3	GCGGCCAGAAAATTCGCGCGCGAACAGGTATG		3	dub3-3	AGGCCGCCGATTCTTCCGTTCGCTCACTGACC		3	dub6-3	GCGAACAAATACCGGCGGCAGCCAGCGATAGG
4	dub1-4	ACTCAATCGGCGCCAGCGATGGTCCTGGCCGA		4	dub2-4	AAAAGCGCAGTCTTTCCGCTCGTTCTC		4	dub3-4	TCGAACACAGCGACGCCGTTCCCGTCGCCGC		4	dub6-4	TGGTGAATCGAGCCGTTGAGGCTTATGGATAC
5	dub1-5	TTTGCAACATTCCGGGGGTTGTTATGCTGATA		5	dub2-5	GGTTTGGAATACGTTTATCACTGGAGTAAAAA		5	dub3-5	AATGGGGTCATTATCGGTTCCTCCGTGATGCC		5	dub6-5	TGGAGACGCAGCGGAAATCGTCCTCGGTGAAT
6	dub1-6	AGATCCGAAGCCTGGCGGGGCGTCTGTACGAA		6	dub2-6	TTTTCGTCCTGTAAAAAAACCGCCTCATGGGC		6	dub3-6	AGCGCTGCTATCAGCTCAAGAACGGCAGCGGG		6	dub6-6	GATCGGAACGCTCCGCCGCTGGGCGCGAAACG
7	dub1-7	AACGCGCGCCGCCGGATCAGTGAGAAAAAATT		7	dub2-7	TTTCGTTTGCGTCGCCTGCGTGCGTCGGGACG		7	dub3-7	GTACGACCCGCAGATTGCTGAGTACGAGCAAA		7	dub6-7	AGACGCTGCCCCTTCGGAAGATGAGGCAACAG
8	dub1-8	CGTGGTGTCGTCTGTCAAACAAAACGGGAATT		8	dub2-8	ACGGGGAAAACGTGGACAGAGACCATGCAGGA		8	dub3-8	TCAGAATGGCCCAGCGATGACGGCTACCGAAG		8	dub6-8	ACAGACGCGGAAAAGGCTGTCGGGCGGGCTGG
9	dub1-9	GCGCGGGCGTGGGCGACGGTCTGTACGTCGTA		9	dub2-9	CAGGCTATAGCCATAAACATATTTTTAAGAAA		9	dub3-9	GTTGTGGTGAATGCGCAGGCTGATGCGCTGAT		9	dub6-9	GTTTCCGGCGTGGCTGATGGCCTTTACGCCTA
10	dub1-10	CGGTAGAGCTGACGCAGGACGACGCGAGCACA		10	dub2-10	GCATGGCCTAAATCGTCGCCGAGCCGCGCCTC		10	dub3-10	TCCGGCGTTCGGTTTGCGGCGGTATCGTCCCA		10	dub6-10	AAGAGCATGAGCAGCGCCGTCTGCGTGCGTCG
11	dub1-11	TTGATCCGCACGTCGTTGTAAAATTCGCCGGC		11	dub2-11	TGCATATCGTTCTCCGAGAGAAGATTCCAGAT		11	dub3-11	GTTTTAATGCCGAAGAAGGCACGGCTGACCTT		11	dub6-11	AGTCGAGGGTAAGCAGTGCGTTTTTGCGTTTC
12	dub1-12	CCGTTTTTCATCCTCGCTCGGGTGTGAAAAAT		12	dub2-12	CTGCCGTCGAGCTGCTCAACACTACAGCGACT		12	dub3-12	GCGAACAGCAAACGGCCCGGAAACACCTCATT		12	dub6-12	AGCGCGCCGCTACAGCCGGGGTCAATCCCGAT
13	dub1-13	GCGAGCGAGGTTCTTGCGACGCTTGAGCCTGA		13	dub2-13	GACGCGCGTTGGTTTATGTTTGGTTTGGGTTG		13	dub3-13	TTGTTGTGCAGGCCCGCGAACGCCTCTGTGTT		13	dub6-13	CTCGCAAACCCCGCAGCGGTGCTTGAGCTGAT
14	dub1-14	TCTTTCCCCTTTTTTACGGACTCCAGAAACTC		14	dub2-14	TTATCCACCCTCTTTTGATGGGATAGGTTCAG		14	dub3-14	CGCTACCGTGTGCTTCATTCACCGCGCGAAGT		14	dub6-14	GTGGACACGATCGCAGACAATATTTACACGGC
15	dub1-15	CTGCTTGCCGGATCGGTGTCGTCTGTCGGCAT		15	dub2-15	ATCCGGCTGTTCTGGCGCGAGATAGACGGCAA		15	dub3-15	ACGTCGTCAGTTTCAAGCTCACTGCGAAGGAA		15	dub6-15	GATAACGCCGGTGTCGCCAGACGTCGTAAAAAT
16	dub1-16	GTGTTATCCTTGGTTAATTGGCATAGTGAAAA		16	dub2-16	CGACGAGGCGTTCAGGCGGCTGAAATCTGAGT		16	dub3-16	TTTGCTCTATCCTCGTCAGATAAGGAATAAGC		16	dub6-16	TGTGGACGATGCCAGCGGCAAAGACGAAGGGC
17	dub1-17	GTCGCGCCAGTATCGCTGAGCGTGGCGTATTT		17	dub2-17	ACGACTAGATATATTGGAATTAAGGAAATGCG		17	dub3-17	GGCATTACGCCGGGTGAGGTTAAGTTCCGCTA		17	dub6-17	GTGGCGCACGATTAAACGCGACGCAGGCTGAT
18	dub1-18	CTGGAATTATCGCGCATGAACGAATCAATCTC		18	dub2-18	TTATAGGCGTTCTCGGGCTGGAAATTCTGCGG		18	dub3-18	TGCACGCCGGCGTTTTGTTTAAACGTCGCGTT		18	dub6-18	ACCCCGAGCACGACGGGGGCAATACGGGGCAA
19	dub1-19	GCTGCATCTTTTAAAGTGAAGGGGAGCGACGC		19	dub2-19	TTAAGGGTTAGCCAGCTATATAAAATTACCGC		19	dub3-19	AGGGCGCTCAGATTGCCGTCATATTCGTTCTT		19	dub6-19	TCACCTGTTGGTAAAAGGTGAGATGACTTTCT
20	dub1-20	AACGCCAGCGCCAGATATTAACAGAGGGATGA		20	dub2-20	TAATCTGGCATATGGCTGTTCGCGTACTCCTC		20	dub3-20	ATCGCGTGTTGATGCTGGCCGCAGCATCTGCA		20	dub6-20	AATACGCCACCGCAGCGCCGTTTTTATCGAT
21	dub1-21	TTGTAGTAAATGACCAACGCACCATGTCACTT		21	dub2-21	GCAGGGGCCGCCGAGGCGTATCACAACGTCCG		21	dub3-21	TCCATCTTGTCCAGGCGCTTTTCCATCTCGTC		21	dub6-21	AAAACGGACGAACGGCGGGCCTTTCTTCTGGC
22	dub1-22	CGCTTTGCCTTTGTGTCCAGTGGGCCGCATCA		22	dub2-22	GCCATGACAACCGCGTCAAACTCGTTACGATT		22	dub3-22	ATACCCCGAACTTCTCAATCAGAGGAATGAGC		22	dub6-22	ATGTTCACCACGTCGATTTCGTGAATGACTTT
23	dub1-23	CGCCTTCGCCTCAGCACTTAGCAGGATTTCGC		23	dub2-23	CGTACGTGGGGGAACTGCGCCGGCGAAGCCAT		23	dub3-23	AGTACGTAGCGGATAAATACCAGGTGCCTCCC		23	dub6-23	GCATGCGTAGGTTTCATCCGGCTCCAGCTGCT
24	dub1-24	AGCACTGGCGGTGGGAGTTGAACCCACTTCGG		24	dub2-24	CCGGTGATAGTTTGCCCGTAAGGCGTGGTAAC		24	dub3-24	GTCCCTCGCGGCCGCGCAGGAGCTGATGCCCGG		24	dub6-24	AGGCTGCTTAAAACTGGACAGGTAGCGATCAC
25	dub1-25	AATCGTGGGCTGACGCACAGTTACGAGAAGTC		25	dub2-25	GGGCGGACCTCGGCCAGCTCGGCGCCAATTTT		25	dub3-25	GCTGCACGACGCAGGAAAGCTTCCATGCCCGT		25	dub6-25	CTTCGCGGGCTGGGTAAAAATCTGCTCGGGCA
26	dub1-26	AATTACTCTCTCTGGAGATTAGTGAGCTGCAG		26	dub2-26	TCGGCGTCTACGTCGACATGACCTTCTCCGCA		26	dub3-26	AACTAGGCAGGATCACCATGAAAGAGCTGCCT		26	dub6-26	TTAACACCCTCTTTTTAACGCTATCCGGTAAA
27	dub1-27	CGAGCAGCCGCCGGGGTCAAATCGTGGACCTC		27	dub2-27	ATTTATCAGGTAACGAGTCCAGAAAGTTAATG		27	dub3-27	ACGCTGGGAGAATGTGAAATGAAACGCGCGCC		27	dub6-27	TGAAGAAACAGATAACCGTATGCGCCGTTTCC
28	dub1-28	CGTCTGTGGCGGGGGTTTCTTTGAGCGAATAA		28	dub2-28	TTTGAAATCAAAGATTGAAATCGCAAGCCGTA		28	dub3-28	ATCCCTGGCGAATTTTTTCATCCATCCATGAC		28	dub6-28	CCGAAAAAATTGCCGGTATCGGCGCTAAAAGG
29	dub1-29	GAAGCTCGCATGACACGTCAGGCTGATGCGCT		29	dub2-29	AGTGACATATCAATTCCTCTCGTATGCCATCA		29	dub3-29	GCTGATTCGCTGCCTGCTCAAAAATAGTCCGC		29	dub6-29	ACCCTGCGGAGCGTCAGGCTCATGGCCGCTGA
30	dub1-30	GTGATTTCGATTTTCATGTTAATTTCCTTTTA		30	dub2-30	CGTTAGCTGATACCGTTGTTAGAACAGACTCC		30	dub3-30	CGGAATAAAACCGAAGCAGACCATCACGTCAG		30	dub6-30	TGAAACACCACAGCGATGAAGTTGCAGTAAGT
31	dub1-31	GCAGCCTGCTCCGGCTCCGGCGCGTCATCCGG		31	dub2-31	AAAATTTTCGTTCCTCGCGCGGGCCGCACCAA		31	dub3-31	TTCAATTGATGATGACCGCGCTAATGTAGATC		31	dub6-31	GTCTGTAATGGCGGGTTTTTTTTGCCTAAAAT
32	dub1-32	GCAGTTGCTGAGCTGTTGAGACAGTTCGGAAA		32	dub2-32	AGTACGTGGAAAAGAACGGATCTCTGTTCGGT		32	dub3-32	TACAAGCGCGATAACGAGAATTTTCACGAAA		32	dub6-32	ACGTAAGGGTTGCCGCCCGATTCCACAGAAACAA
33	dub1-33	AAACAGTGCAGCGCGGCAATATGGTACGGCGC		33	dub2-33	CCGCTGGAATACCTGAGTGACGTTATGCGGCG		33	dub3-33	TGAAGCCAGACATCACCAACCTGGCGGGGAAC		33	dub6-33	TGAACGCCTCGCGCGCAAAAATTTTCGCACTG
34	dub1-34	CGGAGCCACTCGTCAAACGTGAGGCGCTCAGT		34	dub2-34	CGCTGGTGGCGGTCAGCCAGGTGCGCGGACAC		34	dub3-34	AGTCCGCGACAGCACATACATATCGACGTAGC		34	dub6-34	AAGTCGATGCTCGACGACGTGTTTAAAAAAAT
35	dub1-35	CACATAAGGAACCACGCATTATCTAAGTAATG		35	dub2-35	TACCCCACGTCGGCGGAGAGCGCTACCTTGAC		35	dub3-35	TGCAGCTGCGCCACGGCGAGCGGTTCGATATT		35	dub6-35	CGCTGGCGTGCACGTTCGCAACAAACGCGAGC
36	dub1-36	GGTATGCAGCAATGAAAATCAAGAATGACGCC		36	dub2-36	AAGGCGGGCTATAGCGTTGAGCAGGAAGTCTC		36	dub3-36	ATTCGGAGGGAAGCATGTTTCTTAGTTCAGGT		36	dub6-36	TGCAGCTGTACAGTAATCTTCCCGCCCTTGTA
37	dub1-37	CGTCAGCGTGAGCTTGAGCAAAGGATGGAAGC		37	dub2-37	GCTATAGATATTGAAAAAACAGATGAAGAAAT		37	dub3-37	GGGATCGCATCCAGCTCGTTGTCAGCTGTCGT		37	dub6-37	CGGTCGGCCGGATCCTTTACCAATTCGTCAAAT
38	dub1-38	GGGTTAAAACGCGCGCGCTGATTGCCGCGCTC		38	dub2-38	CTGCGGGGCACTCTGGGTCAGGTAAGCCAGCT		38	dub3-38	TTAAAGCCATCCGTAAAAAGCTCGGGTTAACT		38	dub6-38	AGAAAGTGCAGGCGGCTTATCCGAGCGCCGGT
39	dub1-39	AGGGACCAGTCGCGTTTGTGGTAGGTTTCCA		39	dub2-39	GGATTCGATAACAGCGAACTTGTGATAGCTGA		39	dub3-39	TTGCAACGGGATCATTCCATTTGCATCAGGCG		39	dub6-39	TCCAATTGATTGTATTTGTGGCTCGCGAGCCC
40	dub1-40	GCTTTAATTTCTGGTATTTATTGCAACGGAAC		40	dub2-40	GGAACGGAAAAAATAAACCAGCTTTCGGAGCG		40	dub3-40	ACTTGTGTTGCGGGCGTAATAATATTGCCGAC		40	dub6-40	TTTTACCAGCACGGCATAGCCGATCTCAGTCGT
41	dub1-41	AATTTTGACCTTTTTCACTGGCATGAGCATAT		41	dub2-41	ACCCCCGGCTATCACTGGGTGGTTGTTGTGGA		41	dub3-41	CAGAAGGACCGCGAGATGCTTGAAGACCTCGA		41	dub6-41	ATATTGAATTATTCCCGAAGCAATTTCTTTTT
42	dub1-42	GGGCGGAAATTATCAGCCGCGTGCAGGAGATG		42	dub2-42	TCATGACCACAGCAGAGGTCGCAAACAGCGTC		42	dub3-42	GCACTTGAATCCTGAACCGGTAAACCCACGCA		42	dub6-42	AGGAGCTTATCGCCGATATTGTGGGCCAGCAG
43	dub1-43	CTTGCCTTGACAAAATCCGCGATTATGAAAGC		43	dub2-43	TAGTCCGAGTCCTTGCTCATGACGCACCCCAA		43	dub3-43	AACTCGTCGTCTCGGTAGTTTCTGAAACGTTA		43	dub6-43	ACCCAGGGCTTTCCTGAACGCCTCTATCTTTA
44	dub1-44	TGTTGCCGCTAAAATAGTGGAAATATCAGAAT		44	dub2-44	CCATTGAGCAGGTCATGGGCCTGTTTCCGGAG		44	dub3-44	AATCAGGTCTCATCCACCCGTTAGAGTAACCG		44	dub6-44	CGGATGTGGATCATGTCGTAGGGGCTAACTGC
45	dub1-45	GCCGCTCCCGCGTCGTCGTCGGCTGGAGCCTC		45	dub2-45	CAACTACTTCGAGCAGCTTCATCGCCGGTTCT		45	dub3-45	ATTCTTCGCCGGTGTCAGCCACAAAAGAGAGC		45	dub6-45	TGTGCTGCTATCCAATGCTCAGTCGAAATCAT
46	dub1-46	GCTTCAATCGCTGGCTTGAAAAACTGGCGCGT		46	dub2-46	ACAACGTCATCCACGACAGGCACGACGCCACG		46	dub3-46	ATGAAATATGTGACGCACTGATGGATGTGTTT		46	dub6-46	GATAAGGCAGCGCTAAACGCAGTATTTGATGA
47	dub1-47	TTCGCCAGGGATCAGGGTTTTGAACAGGAATG		47	dub2-47	AGCGTACCCGTTGCAGTTGTCAGGCGGGTGTA		47	dub3-47	ATGTTCCAGCCTATTGGCGACCCGGTAGTAAA		47	dub6-47	CGGATATACGGCAGGCCGAAAGGGTTCTGGCA
48	dub1-48	GGAACGCGCACCGGGCCTCTTACCACAATTAA		48	dub2-48	CTGCAACCAAAAAATGAGCCCTATACCACTGA		48	dub3-48	GTGCTCCATTACCTCACGCGGCGTCTGGCCGG		48	dub6-48	GAACAGCGACACGTTGAAAATCACATCCAGGT
49	dub1-49	AGGTTTATACCTGCATTATGAAGCATAAACTC		49	dub2-49	TGCTCTACCTCACTGATAATTTTGAGTTTTCC		49	dub3-49	GACCTGCCAGGTTGAAAGGTTCCCCATGTTTT		49	dub6-49	AAAGATGGTCACCGAAGGCACGCAGTCACGCG
50	dub1-50	GTCACCGGCGCGCTAACCGGCACGGCCATCGG		50	dub2-50	TCAGAGAGTTCGTGAATTTTCCTATTGCCGGG		50	dub3-50	GGCTCCGGGTTAATTCATCAGGCACTTGGACA		50	dub6-50	TGGCTGCGAGCTGGGCGGCGGAAAAGCGCGGG
51	dub1-51	GGTGCACTGTTTGCCTCCGGGTAGCTAAATCA		51	dub2-51	TGCTTGAGCTGATAGCAGCGCTGGAAGCCGCA		51	dub3-51	ATCGTGGACAGCATCAACCGTGCCGACAAGTG		51	dub6-51	GATTGTGTGGGTGTGCGCCGGCAGGTTTCCGG
52	dub1-52	GCTATTCACAACCGCCTCCACGAGTGGCAGGT		52	dub2-52	ATATTTGTGTCGCTTAAAAAAAGATAAAGGAT		52	dub3-52	GTCACACGCTCTATCACTGAGCATTGATAGTC		52	dub6-52	CCATTCGTCAGCTGCAAATTCACGCAACAAAT
53	dub1-53	GCCGCCGCTAAGTTGTGGAGGTTAGCACCCCG		53	dub2-53	GCACGCGCGGCCCCGGCAAAACTGCGACCCAGC		53	dub3-53	AAATCGACGGCGCGAGGGATGAAGCGTGAAGC		53	dub6-53	AAAAGGCCCGGCTCTGACCGCGCAATCGTGGC
54	dub1-54	GCCGCAACGATCAGCACGTGACGCTCGTTGGG		54	dub2-54	TGTAGCGGTGGGTTCCTCCATACACACAGGAA		54	dub3-54	GCTGCCCAGCGCTGGAGAGTGAGCATTTTCAT		54	dub6-54	AGTTGTGGATAATGAATTAAAGCAGGCTATAA
55	dub1-55	CGCGAACAGATACCAAACGAGATGGGTTTGGG		55	dub2-55	TTCCGTTGCTCTATTGGCGGGAACTGCCTATA		55	dub3-55	TTGTAAATGAGTTAAAAACATTTCAGGGCAAT		55	dub6-55	GATAGCGTCACGCTCGATAGCGAGCTTTCTGC
56	dub1-56	ATTTCGCTGAAACAGTAACGGCGCTCTGACAG		56	dub2-56	AGGCGACCTACGGCCGCCGCGCTGTTACGCAC		56	dub3-56	ATCTACGCGCTTAAACTCGATCACCCACACCCA		56	dub6-56	TGGTTAAACAAATGACCGACGCGCAAATAGAT
57	dub1-57	TACAGTATTTACCGCATCGTTAGTGACGCGCC		57	dub2-57	AAACTCTTCATCTTTTCGGGCTCGCTTCCAGA		57	dub3-57	TACGGTAATTTTGCTGCCCGGCGGGTAGGGGT		57	dub6-57	TATGTCCGCATTGAAACCGGGCTGGGGAATTT
58	dub1-58	GATGCCGGGATTACAATGGATGACGGCATGGA		58	dub2-58	AAATATCACCCCGTGTGGGACTGGAAAAAAGC		58	dub3-58	TACAGTGTCCAGACTGACGCCGCTGGACAAAC		58	dub6-58	TGATACCGCCGACCTGGTGACAAGATTTGCAA
59	dub1-59	CCGTTTTTTCAGCTGGCCATAATATTATCGCC		59	dub2-59	CGGCACAAACTAAAAACCGGTAGGGATGGGCG		59	dub3-59	TCGTGACACGGGTTGATACTGTAGAGCGCGGA		59	dub6-59	AAACCAAGAGCGGGAGAAGTCCGGGAAGCCAT
60	dub1-60	GTTATCCAAAACCTTAACCACCCCCGACGCGT		60	dub2-60	GCAGTACGAGATGTTTGGTCTCGGCGTTGTGG		60	dub3-60	CAGAGCTGGCCGCCAGAGTCAACGGCACGATA		60	dub6-60	TGATGGAGAGGTGTGAGATGTCACATATGAGC
61	dub1-61	GTGGTGCCGCGTGAAAATACACTTCTACAGCC		61	dub2-61	GTTGCTATGGCTGGCATTAACTAAAATCGACA		61	dub3-61	GGAAGAAATCGAGGCAAGCGGCGGTGACACCT		61	dub6-61	TGTACAGACTGGCTATTAAATCGAAAATTATTA
62	dub1-62	AGTACACGCGAATCGTTCCAAAATGACACCGA		62	dub2-62	ATCAGTACCGAGCCGCTTTGCTCTGCTTCATT		62	dub3-62	ACTTCGCTGGTAGCTCTCCGAGACTATCATGA		62	dub6-62	CACAATGGCCGGAGGAACCAGAATGACTCTCG
63	dub1-63	GTCGGTAATCGGCAGCGACATAAAAAATATGT		63	dub2-63	GCGAGCGCGACGCAATGGCGGCGGAGAATTCG		63	dub3-63	TTTTTCGTATTAGGCCACAGGTAATCAATCAC		63	dub6-63	GTGTAATCAACGTCGCGGACGGCCTCGTACAA
64	dub1-64	GATGAGGCTGTCCGGACAGGAGGTCGGGCATT		64	dub2-64	CTCTTTTACCTAACTGCTCGCGGATCTTGCTT		64	dub3-64	TTCAGCGCTACCGCCGGATATTTTTTCGATAT		64	dub6-64	ACTTCGCTCGTCGCTCTCCGCGATTACCAGGAG
65	dub1-65	TGTATTTACCCGCGCCACGAAAACCCTGAATT		65	dub2-65	TTTGAGTTTGGGCGGTTTGATTCCAGCATTTG		65	dub3-65	ATTAACGCCAACGCAATTAAGGGAAACAGTAG		65	dub6-65	GCAAAGACGCCGGTAAGCCAGCCGAACGCAAA
66	dub1-66	TGGTTGTCGTCCGGCATTATTGGCCTGTTGGC		66	dub2-66	ACCATGAACCCGGATGAGGTTCTGCAACTCAC		66	dub3-66	AAACAGGAGTGACCATGAATCTGTTTCAACGT		66	dub6-66	ACCCTACCCACTTGATTAACGCGCACCAGAAA
67	dub1-67	GATTTCCTGATAATCACACTCAAATAGCCTGG		67	dub2-67	GTAATTAACTTCGTGCCTTCCGTAATTGAGCGC		67	dub3-67	ATCGACGCGCTGGCGCTTGATATTCCGCTTCA		67	dub6-67	AACTCCGGTCATAACGCCGGACAACATCCCGT
68	dub1-68	CAACGCCCCGCCAGTGTAGGAGCACGGCAGGG		68	dub2-68	CAGCGGGGCGTCTGGCGGCGGCGCGAACGGAT		68	dub3-68	CTCCGGGCTGGGGATTACTGCACGTCGTTAAAG		68	dub6-68	TCGGCGATGCCTGCTGCATGCCCGAAAGTGAA
69	dub1-69	CGCATCGCTGAACTGGAGGCGAGGACGGTTAA		69	dub2-69	TGCCGAAAAGCGGTTGCGCTCAGAGCTCAGAA		69	dub3-69	GCACCCATCGGCAGCGCAACATCTGGCTGGGA		69	dub6-69	TTACTGGATATGCGCGAACGGGGAAAAGCTAT
70	dub1-70	CGGCGGCGCTGGCCGCTACACCGGGCGAGTGG		70	dub2-70	AATACGTCGCCAGCGTTCTTTTTGCCCATGGT						70	dub6-70	TGGTGAGTTCTCTCGCGGCGAAGGGCCAAGGA
71	dub1-71	TGCTCCCAAAGCGATTGCAGGCATTCGTGATA		71	dub2-71	TGCCGAAATATCGCCGGGGAATTCAGATGGTG						71	dub6-71	AGCGGGAATGTGCCGGGTTCAACTGTACGCCA
72	dub1-72	ACCTGGTCAAACAAATGACTGACGCGCAATTG		72	dub2-72	GTACGCTTCGCGCACGCTCCAAGGGCCGAGTT						72	dub6-72	AGAGCACGGCGACGAGATACGCCTCGACGACA
73	dub1-73	CTTTACGGCTCCGACCAGCTCGCGGGCGACTA		73	dub2-73	TATACGAGGCAGACACCGGCGACGGCGAGGAG						73	dub6-73	TGCACGGGTGCAACGTATGACGACACGGGGTA
74	dub1-74	GCACGCTGACACATACCTAAAAAACGCCAAAT		74	dub2-74	CGATCGACTATCAGCGCGCCGCAAAGAATTGG						74	dub6-74	GTCGTCGGCAGCAACGTACGCTACGCGCGAAT
75	dub1-75	AAAGAGGCGTACAAGGAGGCGAAAAGCCTCGG		75	dub2-75	CGCGTAGCCGAGCTGGAGTCGCGGGAAATTAA						75	dub6-75	TAGTTAGAGCAAACGCCGGTGGTGCACTGTCT
76	dub1-76	TTTCGTTTGCGTCGCCCGCGTGCGTCGGGACG		76	dub2-76	CGGCGATCCCAGTAATCAAACTGGTTTTTCAA						76	dub6-76	TGACGTGATCGGCGGCACCGGTGAAGAGAACGA
77	dub1-77	TTGACCAGCCGCACCATGCCCGCGCGGTGGTC		77	dub2-77	TGTCAATTCGATCCCACTGCAAACCGTTTGTA						77	dub6-77	GAAATGCGGGGATAACTTTAAGTGGCAGACCC
78	dub1-78	CAATTGCTTAACGCCGAGGTGGAGCAGCAGGC		78	dub2-78	CGTTTTTCTGCGTCACCGCCAGCCCACTCAAC						78	dub6-78	GTCACGCTGAAATTTAATCTCGTTGTCAGCAG
79	dub1-79	TCGCCGGTCGGGTCGTACGTGTCTTTGTCTTT		79	dub2-79	GTCGTTGGAAAATTAATCCGGCTCTGGGTGTG						79	dub6-79	GTTCAGCGATATACGGAATATAAAGGCACGCA
80	dub1-80	CCATCGCCGCCGCTGGTGTAGAATCGCGCCTC		80	dub2-80	AGAACGCGAGGAGCAAGCTCGCGCTCGAATGC						80	dub6-80	AAACGTCACCGGCCCACTATCCGAGACCCACG
81	dub1-81	GCGGGCGCACTCGTCCAGGTCAGTGGGGATAT		81	dub2-81	CAGCTCTGCTGGCAATTACCAGCAGTATTGAT						81	dub6-81	CTCGACCACTTTAAACGGCTGCATTGCCGTCG
82	dub1-82	CGCCGCCTGGTCGCCGACCGGCCAGAGGTGGC		82	dub2-82	CTTACTATGTGCAACTTGGCGACCGTGTACGA						82	dub6-82	ACAGCGTCACGAACGAGCCGCGCGCGCTCAAC
83	dub1-83	GCATTCTTCCATTGCAATAGTGCACTATCCGC		83	dub2-83	TTACCGCGCAGCACAGCGTTACCCGCGCCGCC						83	dub6-83	TAGGCAAATGTTGTATGGCCTACCGATAAGGT
84	dub1-84	CAATGAGACTGACCCTGAACGACGTCAAAGAA		84	dub2-84	CGCGCCGTTCAGCTCCGCTCTTACGTCCTGAA						84	dub6-84	TTTGTGGCTGTCGCTGCCGGTCTTGGCACATAT
85	dub1-85	AGTGCCATCAGCAATGCCACCCATAATATTTT		85	dub2-85	TATCACCGACATAGTCTGCGAAAATTGCATCT						85	dub6-85	TTGAGGATGCTGAAGCCAGCTGTCTGAAGTAC
86	dub1-86	AATCACGATTTCCGGCACGCGGTTACCGAGCA		86	dub2-86	GTTTCATGCACTTAAGTGGTGACCATCCGGTG						86	dub6-86	AAAAAACAACCGGCTTTTCTGTTACCTCGATT
87	dub1-87	TTCACTGTACAGGCTGCCGTTCCTGATGGCAC		87	dub2-87	GAGTGCGCACCGAAAGGAGCGCTTAAAAAATA						87	dub6-87	GCCGAGCGCAAACCACTCGGCCGCCACGCGGC
88	dub1-88	CGCCTCGAATGAAGCGCTGTTGATATGCGGCA		88	dub2-88	CCCCCGCGCTTTCATCCACGCGTTGAATTCTT						88	dub6-88	GGCGTGCGCGTAGAGCGCCTGAACGATATCAG
89	dub1-89	GCGGGTGTCGAGCGCGTCGTATTAACGTCACC		89	dub2-89	CATAAAGGTAAGTTCTGCGGAAACTCTTGAAC						89	dub6-89	CATAATGCATAACCTCTTTCAACCCACTCTCT
90	dub1-90	TTCATACCAGACTCAGTGTTTTGTGGTCAGGC		90	dub2-90	GCCCAAATTTACGGCCAGCAGTGGACAGCGAA						90	dub6-90	TGCGCGCGCAGCTGGTAGCGGCAACGCGGGGC
91	dub1-91	CTGAAAGGGCGCTTCCCCTCAACAAAGGCCCG		91	dub2-91	CTCCGCGAGAAGTGGGACGTGCTGACGGCGAA
92	dub1-92	TACTTAGCAATGTAGCCGGTGGCCGTTCCCAT		92	dub2-92	AGATGCCGACCCAGGCCGATTGGATAGCTCAA
93	dub1-93	TGAAAATATTCAGCTGATCCGCAACCGCTTCG		93	dub2-93	TTTCAGAACCTTTTTCATATATGCCTTTGTCA
94	dub1-94	TTTATTGAAATGGGGGATATCTCAGCAAAAGA		94	dub2-94	CAGGTATTCCCCGCAGCAGAGCAGACCAGTCT
95	dub1-95	ATTACGCGTGGCGAGTTCGCGCACAAAATCGA		95	dub2-95	TAGCGCGTAAGTACGCGGCGGCTGATGCCCTC
96	dub1-96	CGGCGTCATAAGTCGTTTTGATATCAGTTTGC		96	dub2-96	CGAATAAAGCCGAGGACGGTTTCTGCCGTAGA
97	dub1-97	GGCTACGAGATTTCGTGGAACTGGTATGAGACGC		97	dub2-97	ACGCGGGGCATTTCACCGACGAAGACAAGAGG
98	dub1-98	CCTACGCAAAATAAGGCGGACGATGACAAAAT		98	dub2-98	CGTGGTCGCTGTCACGTTATTTGCGCCGTAAA
99	dub1-99	CAAGAGGGCTGCGATATTTTCCACACTGGCGC		99	dub2-99	TAGCGGTTGTAGACGACCTTGACGGTCTGGCC
100	dub1-100	CGGGTTTACCGTTTGGGTGTAATTTTCACGAC		100	dub2-100	AGTTACCAGAGGAAGAGGAAGAGGAAGATATA
101	dub1-101	ATGCGTTCCCCTTTAGGGTATGCGCGCGCCAG		101	dub2-101	GCAAATGGCGTCCAGTTGAACCCGGCACATTC
102	dub1-102	TTCTGCGGGTAGCTGCGCGCGGTCCAGCGCCG		102	dub2-102	CATTTCAGGGGTATACCGCCGAGCCACCCCTG
103	dub1-103	GCCATCGCAGCATCGCTTCGGCAAGCGCCCGT		103	dub2-103	TGACTTTCCTTTTTGGGGGTGAGCCAGCGCTC
104	dub1-104	TCGACGACGTGCAGGCGGATATGGCCGAGAAT		104	dub2-104	TAATGCTCGCAATCCTGCTTGCCGCTTTCCGC
105	dub1-105	TGCTCGACTTGAGCCTGGCGGATATCAAAAGC		105	dub2-105	TAAAATTTGGCTCTAGTGTAGGTTATAGTCAA
106	dub1-106	TAAAGTATTTTACCAACATGATAAATGTCGGA		106	dub2-106	CCCGCGCGGAGCGGGCAACAATCATGGAGTAA
107	dub1-107	CCCGCACATGGCGGGCTTTCTTATTTGGCGGA		107	dub2-107	TCGATCAGCCTGCCTGCAACGCAGGAACTCGT
108	dub1-108	GCGGTGCCGCATGAGCAAAGAAGTCGAAAAGC		108	dub2-108	CTGCGCTGAGCCACGGTTTTCCGCCGCACTAC
109	dub1-109	CCGAACTTTGTCGCGGTATTCGCGGGTTGTGC		109	dub2-109	CAAGAGGTGGCAAAGCGGTACAGCCTGGCCTA
110	dub1-110	CAGCTAACGCAGGCGCGTGCGCGTCAAAACGT		110	dub2-110	TGCGTGGCGCCGCCTTCGCGCTGTTCGGCCCG
111	dub1-111	GTCGACGGGCAGGGCCGCCCGCTCTGGCTGCC		111	dub2-111	CCTCGTCGCTTTTGTGAATGCTGATGCACGGG
112	dub1-112	TAAATATTTTTTGATTACTTATTTGTGTTCAA		112	dub2-112	GTTAACGGAATTTCTTCTCCACGCCGGCGAGG
113	dub1-113	GTAAAGCCCATTGTTCCAGCGTTGTTTTATGC		113	dub2-113	ATAGGGGGCGAGCTTGAACCTGATATTAACCGC
114	dub1-114	GATAGGCTCCACATTTTTTTGTGCCGCCATGT		114	dub2-114	GCGTCGGCGATCTCGTTCTCACTGACGCCGAG
115	dub1-115	TCCATCGTGTCTCTGATGAATGCGCGCGCAGT		115	dub2-115	ACCTAATAATGTACTTACGGTTCATGAAAGTA
116	dub1-116	TAAAATGTTCCCATTCTCCCCTACTGGTTGCC		116	dub2-116	GTCGTAATGCAGCCCCCGGCCATCAACCGTTAA
117	dub1-117	CTTTCGCTTCAACAGTCACTGAGCCGTCAGTG		117	dub2-117	AGTGCAATCATAAACAACGGCAATCAATTTTT
118	dub1-118	AGGGGATGAATCACGCGTACCCGTGCCGTGTA		118	dub2-118	GATCAACAGCGCCGCTCGGAGTTCTTAATGGT
119	dub1-119	ACATACTATGAGAGCGCAGCGGGCGAGCGTAT		119	dub2-119	CGCCACAACGTAGTGTGGCTTTTTCCTGTGAG
120	dub1-120	ACAGATCACAAAAATAACGAGTACGGATTTGT		120	dub2-120	TAAGCGATACCGACGAGAAGTAATCGAAATCA
121	dub1-121	GTCTGTCCGCCAAATTTGGTGCCGTCAGGTAA		121	dub2-121	CAGGCAGCGCGCGCCGGAGTCAGCACCCCTAC
122	dub1-122	ATGGAAGGACTCAAACCGTATACCCGACAGAC		122	dub2-122	CGCGGTCAGGATATCAACGCAGACCTGGGCCA
123	dub1-123	TATTCTTTCCCGCCAGCATCAAAATCGGCTTT		123	dub2-123	TACATACTGGAGTCGGTAGCAGAGTCGTATCC
124	dub1-124	GACCCGCGCGCCGCTACCAGCTCAATCGTAGT		124	dub2-124	GCATTCCAAAAACCTTTCATTAACATATTCAT
125	dub1-125	CACCACGTGAGTGGAGCCTTGACCGCCGTGAG		125	dub2-125	AGGTTCAACAGGTAACCGCCCGGCGTCGTGGC
126	dub1-126	GTGCGATTAGTGAACTTCCCTGAGCTTAGTGA		126	dub2-126	CTGTACGGCGGCGACCAGCTCGCGGGCGACTA
127	dub1-127	AGTTCTATTCTGGAGGGCGCGGGCGTCGGGCA		127	dub2-127	TTAACTAGGCTTTGTACCCT
128	dub1-128	GATAAGCTCCCACGTCGCGAAAAGGCCCGGGG		128	dub2-128	AGCGGGTTGCGGATATTGTTGCGCAGCGTAAA
129	dub1-129	GCGATAAATACCCTGGCTGTAACGCCAGGTGC		129	dub2-129	CTACGAGTATAAATGCGACGAGGGATATCTTG
130	dub1-130	TTACGTCGTGTTGTGCAGCAGTACCGAATTCG		130	dub2-130	TGATGCGGACGCGCGGGTCGAAAACCACGTCG
131	dub1-131	GTTGATAATGAGTCGTCAGAGAATACTTCTTC		131	dub2-131	ATTTGTGCGCGTTGCTGGGGCGCTCATGGGGA
132	dub1-132	TGACCATATAACGGACCTTTGTCGGCATTACC		132	dub2-132	AATTTCCTGCGGGATGAGGGGATCGAGGCGGA
133	dub1-133	ATGGCTGGTTGATGCAAAGTCCAGCCATCATG		133	dub2-133	CAGTCGTGAATTGATGTGAATCCACGCAGTCCT
134	dub1-134	TGCGCATTTGTGTAAGCCAGGCTTTGCTGGAT		134	dub2-134	CGCGTGTCCGGCTTCTGGCTCACCTGTAACAT
135	dub1-135	CGTTTGTATAGCGAGTTCGGATACCCGCTTGA		135	dub2-135	CAAGGGCTACGCGATTGGCTTTAACTGGCACG
136	dub1-136	GGATTACCAGTCATCCAGTTGTAAAACAGGCG		136	dub2-136	CCGTAAACGCCTTCATCAGAGAAAGAGACCGC
137	dub1-137	TGGCCGCGCTTGGCTCGACTATCGGGGCGGCA		137	dub2-137	TTTTCTGCGGCTTTTTTGGTAGCTGCATCGGC
138	dub1-138	GCTGCTCTGCCTGTATTCGTGGTAACTGCACC		138	dub2-138	TACGCGGCGGCTGATGCCCTCGGCCTCAGCCA
139	dub1-139	CCCCGTTGCACTTGAGCCGGGGTTTTTCTCAT		139	dub2-139	ATGTTGAGTCCGAAATGGGTTCGGAACCCCGG
140	dub1-140	GACGCGGGTATTTACATAGAGCAAAACAAGAC		140	dub2-140	GCGGTTCGCCTCTCGGCTGTAATCGGCAGTTC
141	dub1-141	CTAATTACCCTCGCTGACGCGCTGGCGGGCTA		141	dub2-141	GCGTGCAAAATCACCGGCCAGGCTCCCGACGA
142	dub1-142	TCCGGCAATATCGAGCTCTATCGAATAAATCT		142	dub2-142	TAGCAGCCGTCAAACTCGACGCGCGTCGCCGC
143	dub1-143	TTCATGGAGAGCGTAGAGCCGGGAAGAATTAT		143	dub2-143	AACGTTATCTATCTGCTCAGGACTTCGATCTT
144	dub1-144	TGGTCGACGCCTGCGCGAACGGCGGCACGCTC		144	dub2-144	ATTGATCGCGCAGGTGGGCATAAACCCACACA
145	dub1-145	CACACCAGCGCATCAAACTGGCCCTGTGTGAG		145	dub2-145	GTTGAAATTGCCGGCGTCAAAACTGAGATAGC
146	dub1-146	CGTTTCGCTCGCACCTGGTTACAGAATTGTAC		146	dub2-146	TCTGGCGACAGCATCACTTTACACATCAACGG
147	dub1-147	TGCGGGCTGGGCTGTTGTTCAGCGAGATTTGC		147	dub2-147	TTTTAAATGCCTTTCATCAGAAGAACAGGAAT
148	dub1-148	GCCGGGAGCATTGGCGGCGGCCGCATGAGAGA		148	dub2-148	CGGTATTCGTAGGTCCCGGCGTCCACTACACC
149	dub1-149	GACGTGATCGGTGAGCGGATGAAAATCGCATA		149	dub2-149	CGATTCAGACCAGGCGGAGCCGGGGACGACAC
150	dub1-150	AAAAATGTTGTTAAAACTGATTTTGTGCGCGC		150	dub2-150	CATCAGGCACAACCGGCGCGGGCGGTGCTGGC
151	dub1-151	CGTGGAGACTGAGAAATGACAATCAGTTTTGA		151	dub2-151	CAAAAATTAAAATTTTGTTTCCTGATTATACGC
152	dub1-152	TGCGTACAGAAGTGCGTAACAGTGATTTAAAG		152	dub2-152	GCGAGGCGGAATACACGCTCAACGCCTGGCTC
153	dub1-153	CCGCAGCCGCGCTGAAACAGGCGCAGAACCTG		153	dub2-153	ATATACGCCGATGCAGTGCCGGAAACCGACCC
154	dub1-154	ATTTCCGCGGGCGCAGGGTGACAGTGATTAAT		154	dub2-154	TCGGCAAAAGTACAATTTGTGAAACGTTACTA
155	dub1-155	TCACCCCGCATTATTGCCAAACCTGGTTATTG		155	dub2-155	GGCTTTTGGGTGGGGGTGGTGGCAGCGCGAGC
156	dub1-156	TGATCGCGGCCCTTCGTGAGCGTGGAGCAAAA		156	dub2-156	ACCCAATTATTCGCGCTCGTTTTTCTGCTCTG
157	dub1-157	CGCGACTACTCGCAGTTTATCGCGTACCCCGA		157	dub2-157	CGATCCGCCCATTCATTACTGACCTGAAAGAA
158	dub1-158	TTCATTGCCACCGGCAGCTACATTGAAAACAA		158	dub2-158	TGCAAACAGGCGCTTAAATTCTGCCGCGTACA
159	dub1-159	CACGAACGGCTTGCGACGGTCGCTCGCGAAGC		159	dub2-159	TTAAGTTGTTGATTAAAAAGGCGCTAACCGGC
160	dub1-160	CACGTCTATTTTTGAACGCAAAAAGCCTCTTG		160	dub2-160	CGTTATAGAGAGCGTGCAGCTCGATCCTCCCC
161	dub1-161	ACTGGGAGCGCGCGGCACAGGCGCAGCAGGGG		161	dub2-161	GGTTTGTGTTCACCGCTTAAGTTAATGATATT
162	dub1-162	ACCCACCTGTTTTTTCTCGACGGCGCTCAGTA		162	dub2-162	AGTAACTTATGGTCAACGGCCACCAGCGGCTT
163	dub1-163	ACACGATCACTACAGCTAACGCGATTGCGGAA		163	dub2-163	ATTAACCGCCTGTTAGTACCTGCGCCGCGTGA
164	dub1-164	CGATGCGCCAGAATTTACACATCGTCAACGCT		164	dub2-164	CCGTGCGCTGCTCGCCCTCAAATGCAATAGCC
165	dub1-165	TGCACATAGAATGTTCACGAAAAACGTTTACA		165	dub2-165	CCGGCACCGTCGCCCGCGTAGCGCGTCATGTC
166	dub1-166	AATGCTTCCAAAATCGCTGGTGGAGTGAGTAA		166	dub2-166	TAATGCGCGACAGCCAGACAAACTTTCTTCAA
167	dub1-167	GTTAATCAGGGTTTTGTACTTATCCATGCCCG		167	dub2-167	GGCTTGGAAAACCAAAAGGCGCGGGCGCGAAA
168	dub1-168	CGAGCGCCCTGAAGCCACCAAAGCAAAAGCAT		168	dub2-168	GCGCTGCCAGCACCGTTCCGGGGCCAGCAGGG
169	dub1-169	CAAACTCTGCTGCTAACTATCTGGCTAAAGCG		169	dub2-169	AACAATGTTGACTTCGAGAGGTTCCATCCATT
170	dub1-170	GTGTAACCGGCGCGGCGCGGAACTCTTCCGCG		170	dub2-170	GGATGCCCCTGATTACTGGACAGGTGAGCAAG
171	dub1-171	GCCTTCATATCCAGACTGTCAACGTTGATTCC		171	dub2-171	CTGGGAGGCTTTGTAGGCACGTTAATCGGTGT
172	dub1-172	TTTCGTTCAAACAAATCGGTGTCGCGCTGGCC		172	dub2-172	CTACTTCAATCGTGTCTGACCCTTTGGCGGCT
173	dub1-173	TCGACGCAGGTCGCCCGCGCGCTGCGCCAGCG		173	dub2-173	CGTATCCTCCTTTTGTTGCGTACGCAAGGAGA
174	dub1-174	GGCACTGGCTGAACGTGTCGGAATGTCGGCCG		174	dub2-174	GTCCTGCTCAGTGATATAGAAATTCCTCCGGA
175	dub1-175	GCGGATCTAAATAAAATAACGTATCTGGCCTG		175	dub2-175	TCTTTCGCGTTACGCTTCGTGATGAGGATGAA
176	dub1-176	CGTTTAATCTGTGTTTTTTTGTTAATTCTTGG		176	dub2-176	TGTATCGCGTCATAAATACCCGAAATAGCAGC
177	dub1-177	CGAGCCTGAAATATTTGGAGTGATTTGTTTGT		177	dub2-177	GGCGGGGGAGTTTAGTAACAATCCCATGCAAA
178	dub1-178	GCCACAACTGCGCCATCGATTACTGCGCTGAA		178	dub2-178	TGCTTTAACTTCGCCGTTTTCCATTTCAATCA
179	dub1-179	GTGAGAGTTTAGGCATCAGTCGTCATCATCAG		179	dub2-179	TGTCCACGCATCCGCGCCCGCAAAAATAATCG
180	dub1-180	CAGGATTGTGGCGAGAAGAAACCAGTCAGTGA		180	dub2-180	CAAATGCACAGTCTAGTGAGTTCGCCCAGTAA
181	dub1-181	GAAAACGGGAATGAGTGCAGGGTACTCTACAC		181	dub2-181	GCCCGCAGCATAACGCCGAAATCCTGCAATTC
182	dub1-182	GTGACCTCGTTGGAATCAGATAGCTTAGCTAT		182	dub2-182	CCTGTATTCAGCAGGTTCAGTTTGCGCAGGAG
183	dub1-183	GATTTGAGGACACCAGAGACCAAATCGACCGG		183	dub2-183	AATCTGTTCTGCCTGCTGGTCGCTGCGCTGGA
184	dub1-184	GCGTCCCTCGGTTGTAGGAATTGGTGCGGGCA		184	dub2-184	CAAAACGCAACAGGTTCAGCGGGTTCACGGGT
185	dub1-185	ATCTCGCAGAAAGGGTAAAAAAAATGGCTGAA		185	dub2-185	GGCTTCCGCTCGGTTGGGAAATACAGCTAAAA
186	dub1-186	GCGCTCAATACGCTCACAGTTACCACCTGTCC		186	dub2-186	GTCGAAATAACCACATCACAGGTAGATAAATG
187	dub1-187	CCCTGACGCCCTTCCTCAATGGCTTCCAGTAT		187	dub2-187	GTGGTTGTTGCCAACGGCTACGAGAACGTTTT
188	dub1-188	CACTATCGCAGGTTACCACTCTGGCACGTAAA		188	dub2-188	TGGTAGATTGCCCGCGCGCTATCCAGGCTGGT
189	dub1-189	CCGCTCTGGACTTTGGCGACAAATGGCAAGAA		189	dub2-189	CGAGCGCATCAGCACGTCGCGGTCCTCCGTGG
190	dub1-190	CGCTGGTATCAGTAGTTTTATTACCCTTACTC		190	dub2-190	GGCATATAAAGATGCACTGGCAATGTTCCGAC
191	dub1-191	CCCTGGGTCGTGAACTGGGAGCAGGAGCTTAA		191	dub2-191	GCGGAGTGGCCGGGATGCTCGGTAAACTGGTC
192	dub1-192	ACACAATCAAAGGGCCGCAGCAGAAACAGTAT		192	dub2-192	TATGAGAAGTGGCTTAAGGGCTGCCGGTTTTC
193	dub1-193	GCGGAGTGGCCGGGATGCTCGGTAAACTGGTC		193	dub2-193	GAATCAACTTTGAGGTAAACACCATCACCGAC
194	dub1-194	TCAAATAACCATGCGCTCGAACTTTTTGCAGA		194	dub2-194	GCTTTTTCTTTCAGTGGGTCGCCCTTCGCCTT
195	dub1-195	CGGGTTATCAATCAGAATGGCTGGTCATCGTC		195	dub2-195	TCTAAAATTTTAATTGGCATCCAAACTAAGGA
196	dub1-196	CTCGGGCACCATAGTTTGTAACGCCAGGTCGA		196	dub2-196	GACACGATGGCAGGCGCGCTGCGCTCGGTGCT
197	dub1-197	GATCTTGCAAACCAGGCCAGATATCAGTCGCT		197	dub2-197	CGTACGAGGTTGAGACTACCGGTCCAACGTCC
198	dub1-198	GCCGGGTACTCCATTGTCGAAATATCAGCGGG		198	dub2-198	AGACAGGATATCGAGGCGAGCGTGATTGGCGGC
199	dub1-199	TAACCGGCAATATGTACGTGGACAGGCAGGCC		199	dub2-199	TCTGGCCTGGAAGGCCTGCCGCAGGACAAGCC
200	dub1-200	CAAATCATCCAACTCATCGGGGCTAAAACCGG		200	dub2-200	TTTGCTTACTTTGCGTTATTTAGAGAGACATG
201	dub1-201	TGGTCCCGTCTGACGCTGTTCAGATGCTGCGC		201	dub2-201	TCTACAACTTTAATGCAGAAACTGGTGAGTTC
202	dub1-202	ACGGCATGGAACCAATGGCGGCTTCTTTTAAA		202	dub2-202	GCCAGTAGAGCGGCCTGCGGAGCGTCGCGTGG
203	dub1-203	GTTGCGACCATGATTGAAGAGCGCTCGCGCGCGTGTTCCCCGCTCGCGCGC		203	dub2-203	TACGTCCTGTCCTTATCCGGAGGTTGCAGCAG
204	dub1-204	TAGGCGCGCAGGTCTCCAGGACGCAGATAAAG		204	dub2-204	GACTTGTGGCGGCAACTTAAACGCCAGCGCCA
205	dub1-205	CCTGCTAAATCCCGCGCGTCCGCAAAATAATC		205	dub2-205	CACTTCACGACCGGCGCTGCGCAGCTTTCTGG
206	dub1-206	CCGGCGGTAAGGAATACACGTATTTAATTTCT		206	dub2-206	GTATCAGCACAGCGTGACGGCGCATTTTTGGG
207	dub1-207	ATCCCCGATGTTGCGGCGTGGGCATCAAACAG		207	dub2-207	GAACGGTCCACAACATGCCGTATGTGATGGTC
208	dub1-208	TCTGCAAACAGGAGGTTATCAACAAGGCTGTT		208	dub2-208	CAAATACGGGGGATCAACAAAATGCAGGGTCG
209	dub1-209	TCGGGAAACAACTCGAAGTGGTTGCAAATAAA		209	dub2-209	TGCCGGTCTGGACGTATTGTTCGAGCTGCTGC
210	dub1-210	GGATCGTGTCGTAAAGGGTTAATTCCATATTTC		210	dub2-210	GAGCTCCGCGAAAAGGCGCTCGCGCAGGCGCG
211	dub1-211	CAAACAACGTAAGCCAGCTTTACCAGCAGCAG		211	dub2-211	TTTTCGTTTATCGCCACTTCGTTGACGGCAAG
212	dub1-212	ACGACGTCGCGCAGGCGATCTGGTCCGCAAGC		212	dub2-212	CATTGATTCGTGAATAATATCGTCCGCCAGCT
213	dub1-213	ACCAGCGGCCAAAGCGGCCTCGATTTCCCTCA		213	dub2-213	TTCCGGGCCGATATCCGGCGCAAAACCGAGAT
214	dub1-214	AGCCGCACTCGTATGATGTCTGGCGGCAGAGA		214	dub2-214	CAAAGAGCTGCAAGTCAGACAGCTGGAGGACG
215	dub1-215	TGGTTTCCAGCGTTTGCCCCTCGCGGTGCGCC		215	dub2-215	AAAGGCGGCAAGGCGTTTTTAAGGCGCAAGGA
216	dub1-216	TTGCTCACCCCGTGCACGGTCGCCCGTTCACC		216	dub2-216	CAGAGGGCGGCATGAATAAGGATATTTGGCTG
217	dub1-217	TGTATCCCCGACGCGATAATCACGGTCATTTT		217	dub2-217	GCTTTGTTTTGCTGACGATTTTTATTTTATTC
218	dub1-218	GCACTTTCAAAGTGCCCAAAGATTTCCCGATC		218	dub2-218	GGCGAGCATAGCCCGTGCAGCATGAGGGATTG
219	dub1-219	TCGGTGATGGTAGACTGGATCAGTGGTGTCAC		219	dub2-219	GTCAGCCCCCGACAGCGGGGTGCCGGTATCGC
220	dub1-220	AAAAGGACGGACACCTGTTCGCGGAAATGTCG		220	dub2-220	TTTGATCCTCATCAGCTCTTCAAGACGCTGAA
221	dub1-221	CGGCTACAGAAAGTGATATCCAGCTCGCCGGG		221	dub2-221	ATTGCCAGCATTTTTAACGTGCCGGCGCACAT
222	dub1-222	CAGGAGCTTAACGAGAGCCAGATAGCAGCCAC		222	dub2-222	CCGTCTCGAAACTGGTCGAGGGTTATTTACCG
223	dub1-223	GCGGACGTGTCGAATAACGCTTTGCGCGGCGC		223	dub2-223	CAATAATGGGTTTGCGTACCGCTATGATGACG
224	dub1-224	GAGAGCCGATTAGCATTCCTCTGATGCTGACG		224	dub2-224	GCTCCAGCCTGAAAGTAAACCTCAACGGCAAA
225	dub1-225	GCTCTGAGTGGTGCCTGTGCGGCCCTGTGCTG		225	dub2-225	AAACAGAAAGAGAAAAATATTTAGGCAGGTTT
226	dub1-226	TTTTCAACGATGACCAGGATTTGCCAAGCTCA		226	dub2-226	GGGTTAACTCTCGACCGCTCGCCAATGACGCA
227	dub1-227	GCTCCGCTCGGTGCCGCCTTGCCTATTTTGGT		227	dub2-227	AATGGGTCAAAGCGCAGATCCGAGAAAACCCT
228	dub1-228	GTGCGGCTATAGGTGGCACTGTCCTACTCACT		228	dub2-228	GGCGGGAAATACGGCGTTTTTGAAGACTGTAT
229	dub1-229	GGTTGGTACAGCGGCCGCTCCCGGCAGCCAAC		229	dub2-229	CTCCCGACGAATGTCAGCCTGTGCTTTCTGGA
230	dub1-230	CCGCAGCAAGCGGTAAATACGGCATCGTGCTG		230	dub2-230	TGCGCGATTGCCCAGAGCCAGTTCCGCCTGAA
231	dub1-231	GCAATCCGGTCAGCATCATTTGGGATATCTGC		231	dub2-231	CGCTGGGTGTTGAGCTGTCACTGCTGGAGCGC
232	dub1-232	AACCCGTCGAGCGGTGGGCCTGATTCAAAACT		232	dub2-232	CCGTGGTGCCAGCCGCATGGAAGGCATCAAAC
233	dub1-233	CTGAACTTCATAGCGCATTACGAACTCAAGTA		233	dub2-233	CGCTCTTGCGGGGTCGAGGTAACACCCAGGAT
234	dub1-234	ATGAGGATGGTTTTTAATGGCAAGTCCACTAC		234	dub2-234	TACTTTGAGAAAACCGCGCAATCTGTGCTGGT
235	dub1-235	TTTCAGACGCAGTTCTCAACGCTTTTGACAAC		235	dub2-235	AAGCAGACAAACTGGAAAGTTGTTATCTGGAA
236	dub1-236	ACTACAACAAGCCGATCGACATGCTCAGTGAG		236	dub2-236	AACGCCCAGGCGTCAGACGCATACAGGCTCG
237	dub1-237	TATCAATCAATCAACAAGGTAAAAGAGCCTTC		237	dub2-237	TCAGATAACGTTAGAGATGGTGCGCTAATGCA
238	dub1-238	ATAACCGTCGATTAACGCGCTGGCGCGGTCGA		238	dub2-238	CTCCGCAAACTGAAACGCGACCGTGAAGTGGCG
239	dub1-239	GACCCGCAGCGCGCGCTTAACGTTGGTTTCTC		239	dub2-239	CGGGTGTGCCTTTTGGATGTAATTTCCACGAC
240	dub1-240	ATTTCACCGGCGGAAGCTTGGGGCGTCACGAA		240	dub2-240	CACACGGCGGCACAGACGCACTGAGCAACCTGC
241	dub1-241	ATTTCAGAGCAAATCCGGATCGAAGGGCAGGG		241	dub2-241	CCAGCCAGCCCCAATGTGTCGATAAAAAGTGA
242	dub1-242	AGATAGATAGTTATGAGTAACTTGCTGAAATT		242	dub2-242	TTGACAAACCCGTTTTGACCACCCCTAAACCT
243	dub1-243	TTTGAATCACCTGCATATTGCGAATATGCGGC		243	dub2-243	CAAGAGCGATATTGGTTACCTGGCTCATACTG
244	dub1-244	CGCGGCTCTATCCCGGAATAGTTACCGGAACA		244	dub2-244	CGAATAAATTGCTAACCATGCTGCGCCTGACC
245	dub1-245	CGTGAGCGAAATAAGCCAAGAACTCAGTGAGC		245	dub2-245	CCAGGGTAGTTTTTCACCCGATACCATAAAAT
246	dub1-246	GTCTCTGCGATAGTGGCCGCTATCTGGCTCTC		246	dub2-246	AGCGCGCGGGCTTTCAATCAGCCGCTGCTGCT
247	dub1-247	CATCCAAAGGCGTTATCTTTGCTGGTGAGGGC		247	dub2-247	ATTTTTAGCGGTACTGACGGAATTAAGTTTGA
248	dub1-248	AAAATATTATTTTTTGTGTAACGCTTCCTGAA		248	dub2-248	TGGCGGATAATCGCGCGCTGGTCAGCCTTGCT
249	dub1-249	GCCGTATATTGCGCTCCGCTCGTTACCGGCAA		249	dub2-249	ATGATATAGGTTAACCTATAATTTATTTCATC
250	dub1-250	AGCGCATTGTTGAGTTGGGTGGCGAGTGTGAC		250	dub2-250	TCCTGCTACCGCCTTTCGCTATAATTGCCACC
251	dub1-251	CCAGGTCATAAACCCGGCTTTCCATCTGTTCG		251	dub2-251	ATTTCGATTCTGGTAGCCATATCTCACCAAAT
252	dub1-252	GCGTTGTCGGTTTTCGCGTGTGAGTTCGACAC		252	dub2-252	CTGACTGTGAGTTAACAAAGTCAGTCATGTAT
253	dub1-253	AAAACTCGGCGGCCGCGCCGAAAACTCCAGTC		253	dub2-253	CGCGTCACCATACCCGCCAAAACAACTGTACA
254	dub1-254	CCGTTAACGCCGTAAACCTTGGTGCAGGTACA		254	dub2-254	ATGCTTACTCTCCAGCGCTGGGCGGCGGAAAT
255	dub1-255	AACAATTGCAGGTTTTAAATATGCTCGTTCGC		255	dub2-255	TTTCCGCTTTCGTCGGCAGGCGCATTAAGCAG
256	dub1-256	ATGTTCAAACGCTGGTTACCAACCCGGTAATT		256	dub2-256	CCGTCGTTCTCGCCGTGAATAACAAAAATGGC
257	dub1-257	GTTAGTGACATGTCACGGTTTGCTCGGCACAT		257	dub2-257	GCCTGTTAACGGTGACCGAGAATGGCTGAGAT
258	dub1-258	TGCGTTTTTGCGTTTGCTCATCTCGGCGTAGA		258	dub2-258	CGTCACGTACCGGCATTCAGACATACCTCGCC
259	dub1-259	ACACTTCGCTCATTTGGAAATACGCGGGCATT		259	dub2-259	TTTAGCTTAAGTTTTACACAATCGTAAAAGGG
260	dub1-260	AGATGGCCCGGAAGACCATCGTTAAGCGAGCC		260	dub2-260	TCACAGCTTCTGATGTTCAAGGATTTACTCAA
261	dub1-261	AGGAAAATTAAGAGGCGAAAATGCTTTGACTT		261	dub2-261	TTGATTCACTGGTAGTAGTGCGCACCTCAGCA
262	dub1-262	AACGGCATCGAGGTCACGCTCATTTATTCAGG		262	dub2-262	GAGCGAAATAAAATGCCTGTACAGACTAATTA
263	dub1-263	GGGGTTTTGTAATTATATTGGCGCTCCCATTT		263	dub2-263	GGGCTGACGGCTATGCGCTGGGTGCGCGGCGG
264	dub1-264	TTGTCTTTGCAACCTCGACTCTCGCAGCCGGA		264	dub2-264	GTTCGCTATTCGGGCTGTCAGGCGGTCAATAA
265	dub1-265	TTCAGGCTGTGGATTAACAATCCGGCGCGTCT		265	dub2-265	GGCTTATTTGTAAACGCTTTTATTATGCGCAA
266	dub1-266	AATAGCGCGGAAATTCTCATCTTCGTAACACC		266	dub2-266	AGTGTGGATTTGTTCATTTTGCTTTCCTTTTC
267	dub1-267	CGATCGGTGACGGGGTGTTCAGTATCGACGGA		267	dub2-267	CGCGGACTGTATACCAAAACTATCAAATAACG
268	dub1-268	AGGTGATGCGTGAGCGCATATAACGGCACCGC		268	dub2-268	CCATCCTGGATATGTGGAACGATATTGCTGTA
269	dub1-269	AATCTTGACTTTTTTTACTGGCATGGGCATAT		269	dub2-269	TTGTCGTCCGTGTATTGCTCCACGGCTGCAAA
270	dub1-270	CAAAAAAACGCGTTCGTGGGTGAATAAAACGA		270	dub2-270	ACGTTGCGTAAGGCGCTGGGCCTGCCGGAAAA
271	dub1-271	ACCCAATTATTCGAGCTCGTTTTTCTGCTCTGC		271	dub2-271	AAAAACTCCGTCATAACATCACGCTTCTTGGA
272	dub1-272	TCTGACGCCCGTATTTATAGCAAACTGCCAGA		272	dub2-272	CGCGATCAGGGTTACGAGTCGCAAATCATCAA
273	dub1-273	GTTGTGCAGATATTGACGCGCCGCTGGATACT		273	dub2-273	TAAAATAAAAATCCCTACCACGCGTTTACCCC
274	dub1-274	TGAGTTATAACAGGCTGGTGGAAATAGTTGAT		274	dub2-274	CATCCTCTGTTTTCTCAAACGAGCGTGTGGAA
275	dub1-275	GGCTGCAGCAATTGGCAGGTGGCGCGCGATTC		275	dub2-275	AGCCAGGGCGGGGCAGTAAATTTTGGGCTTGA
276	dub1-276	AACGAGCCCGACGAAAGGTTTGTCCGATTGTGC		276	dub2-276	GTATGGCGGACCTCGCTCAGCGCGATGGATAT
277	dub1-277	ATCCTGCTCGCGGCGCATCAGAAACAAAAACG		277	dub2-277	AAGATCCGCGCTGCCGGGTATGATGCCTGGCG
278	dub1-278	GATAACAGCCAGGCGAATACAGCCAGCGGCGC		278	dub2-278	TGATCTTTGCTTTGTTGATTGAGCTTGTTGAA
279	dub1-279	GGAATTTTGACGCGCGATATTTGCGAACGGGA		279	dub2-279	ATGACAATCGAGCAGATCCGCAGACTGTTTGC
280	dub1-280	CTGCCCCTTTGAATTACCTGATAAATCCAGCA		280	dub2-280	ATTTTCAGAGCGGCCAGCGCGTAGTTGCGGCA
281	dub1-281	AGTTACCATACTTTTTGATAGCGCTACATTAC		281	dub2-281	GGCGAGATTGACGAAGTGCTGAAATCACTGGA
282	dub1-282	GAGTAACTGGCTATAGCGCCAACAAGGGTCAT		282	dub2-282	CGAATATAGCCCGGAATAGAAAACGTCCTGTT
283	dub1-283	TCATCGCCCGCCAGTTAAACCGCTCATACGAA		283	dub2-283	GTGTCGTATATCCGGATGTGACTTCCGAAACC
284	dub1-284	CAGTGCGAGCAGGTAGCCCAAGCCGTTGGCTG		284	dub2-284	GCAATGCGCCCTGATAAGACCTGTGGAGCGCG
285	dub1-285	CGACAACTAGATTCAATGGTAGGAGAGCCAGT		285	dub2-285	TACGGTGGCTATGTGTTTAGTCTGGATGACAC
286	dub1-286	AAGAGTGTCTGCGATACACCGGCCCGCCATCA		286	dub2-286	CATGTATCCAGCAGCTATCCCCCCGGAGTTCA
287	dub1-287	AATGGCAACTGACTTCCTGCATGGCGTGGAGG		287	dub2-287	TCTACGCAGGTTGCCCGCGCATTGCGCCAGCG
288	dub1-288	CGCTGGTTCCGCCCAGCCCGAACGCGCCGGTC		288	dub2-288	CCAGCCAAATGGCCAGAGGGGGGCCCCGGGCT
289	dub1-289	GTCGGTCGTTTGGAGCTTGATAACGGTATTGG		289	dub2-289	GACGCGGGTATTTACATAGAGCAAAACAAGAC
290	dub1-290	ACACAACAGGGTTCACGTGAATATTTTGAATC		290	dub2-290	AATAAAGAAGAATATGCGGCGGCACAGCGGCA
291	dub1-291	TCGGACCGCTCGCTCTGCCCGTCAAAAAAATA		291	dub2-291	CGCTGCACCGCTGGACGCGGTGGCCTTTTTGC
292	dub1-292	GTATCGATATTTCAGCTCCATACTCGGGGCGG		292	dub2-292	CGCTGCAATGGATGCTCGATGATGGCGTGGCTGC
293	dub1-293	CGCCCACTGCCGAGCGACTCACGCTCTACCGG		293	dub2-293	TCCTTGTTGGCGGCCACGTTCTCCAAAATTTC
294	dub1-294	AGAACACGTTTCCTATGGGGGGCGGTTATTTT		294	dub2-294	GAATCATAACCGCAATTACCGACGACCCTCGC
295	dub1-295	CACGGCCATAAACTCGGGACTTAGCGCCTCGGC		295	dub2-295	GGCGGCGAGGCGAACAAACTGCTCACTATGCT
296	dub1-296	AGGATTGCGATCACGGCAAGTAGAAATAAAGC		296	dub2-296	ACGCAGATTGCCGCCGCTGTTCGCTCCGGTTC
297	dub1-297	GTCTAGCGGATAATTGTTTTCATCAATTTCGG		297	dub2-297	TATTTCACGGCAGCGTAACTGATATCCCGCTG
298	dub1-298	CCTTGCGTGTCTCACTTCTGTCCCACCGTTAG		298	dub2-298	TCCGAAATTGTATTCAGTTTTCTGAAAGCCCT
299	dub1-299	CGATCGATAAATTTTCCCGACTCCCTGAACTG		299	dub2-299	CTACCGGCTCCGCCCGCTCCCGCAGCGCTGGC
300	dub1-300	CGCGGCCATTCTTTTTTCTGATGATAGCGGCT		300	dub2-300	GGATTCTGCTCTCGATCTTCAGTTGATGTGGC
301	dub1-301	GGCGCAGAAACGATATTCGCGTTATCTGCTGG		301	dub2-301	ATCGTCACAGTGAAATAGGTGTTGTAGGTATT
302	dub1-302	AAACGCCAAGCCTCAAGATAAACCTTATTCGC		302	dub2-302	CGTTCGCGTGGTATCTAGCGGCGGCTAAGGGC
303	dub1-303	TTGAATTTCCTGGAATCCCACGCGGCCAGAAT		303	dub2-303	GCCGTTCCCGTCAATGCGCCGGTGACCATTTT
304	dub1-304	CCTCGGTGGATCAGGTGCTGCGCGCTAACCCG		304	dub2-304	ACGGCGGGCGGCGGTGTGGCTCCAGAGTTTCA
305	dub1-305	TTTGGTGTAACGCTGGAGCAACAACAGCACAA		305	dub2-305	GTTTAGCCAAAGTGTGCGATGGGTGGATTATT
306	dub1-306	GAGCAATTATGTTTGTAATTCGTTCAAAAGAC		306	dub2-306	CAAGACCCGAATCGACTGAATATTTTATTCCC
307	dub1-307	CTCGTGTAAATCACCATCCACCCATTCTACAT		307	dub2-307	GCGCGCGAGGCCGCGCTGCCAGTTGAGCAGCA
308	dub1-308	CAACTCATCGAACTGTCCGGTGAGGTAGGCAT		308	dub2-308	GCCGCCACATTTGCAGCGGCCTTTTGGTTTTA
309	dub1-309	AACGAGTGGAGACAACACTGAAAATAAAATTA		309	dub2-309	CGCAAAATCGCCACCGTAAAAAAAATCGCTTC
310	dub1-310	AACGCCGCCGGTGCGTTCGCGCGCTGCGCCAC		310	dub2-310	GCGTGGGGGAAAGTGCGGCAGGTTTCCGGCAG
311	dub1-311	AGAACGGCGACGGGGGAGGCGTAACTGACCCG		311	dub2-311	TACATGGCTGCAATTAAGGAGATTCTTATCAC
312	dub1-312	CCAGAAATTCGGCTCGCTGCCCAGCAAATACC		312	dub2-312	CCAACGAACTCGGCCTCAAAACGAGGGGCATGC
313	dub1-313	CTAAAATCGTCGTCCCATAGCGGGAAGTTTTG		313	dub2-313	ACAACAATAAAAATGAGCCCGCATCTGAGTGT
314	dub1-314	GGCTGGTACGCATGAAAACGCTCACCACGCGC		314	dub2-314	GGTAGCACATTCGGCCAGCGCGCGCAAAACAA
315	dub1-315	GGGAGCACGTTCGGCCAGACCGCACAAAACAA		315	dub2-315	GTACTAATTGGATGAGGTATCAAATGAAAGCG
316	dub1-316	TCGTTCGCCAGCACCCAGATCGGTTTTTTGTC		316	dub2-316	AAAACAGTCAAACGCCATAGAACTTGGTGGAC
317	dub1-317	CGTCAGTACGCTGTACCACCTGCATAAACCGG		317	dub2-317	CGAGGTGCCGGATATTCTGCGTTCCTACTTTG
318	dub1-318	TACGGGCTCCTCACGGGGGCTGTAGTTCACCC		318	dub2-318	CTGAAATTCCCGATCGCTATGCTTTATTGGCT
319	dub1-319	CCAGTGCAGGAATTAATTAACGGCGCGTGGCG		319	dub2-319	CCAGCGCTGGATCTGGGTTTTAGATTGGCAAT
320	dub1-320	AACTTACCAACAAAATAGGCGAGCAGGGCAAC		320	dub2-320	GCGGTACTCGCAATGTCATGGTGGGTGATAAC
321	dub1-321	GGCAACCCACTCAAAGAAAAAACGTTTTACAA		321	dub2-321	TTCAACACGCCAGCAGTAGACGGCGGGGACTA
322	dub1-322	GCGGCGTGCGCGAGATTCCGGCACCAGTCGGC		322	dub2-322	CGCATTTTAGCCACGTCCTCGCGCCGCTGCCC
323	dub1-323	GGCGTGCTGTGGGTAGATAAGCGGCTGACGGG		323	dub2-323	TGACTACGCTACAAATAAAAATTGCGCTGGCC
324	dub1-324	GATTCTGGTCGACACACTCGAAGAGGCTAATC		324	dub2-324	GTGAATTTTCGGAACGGACAGTTGCGCGCCGC
325	dub1-325	AGGCGCGCAACTCTTGGACGTACTCTCTCTGG		325	dub2-325	CCATCTGTGGCAGCTTCCAGCATGTCCCAGTC
326	dub1-326	GGGTGGGTTGCAGAGAACGTAACGCCGGTATT		326	dub2-326	AGCGCCTTTGCCTCGGCACTTAGCAGGATTTC
327	dub1-327	GCCGCGTGCTGGCTGCCGAGAAACTCGGGTTT		327	dub2-327	GGCGGATCGCTTCGGGTATCGGCCGCACAATT
328	dub1-328	ATATCGTGGCAGATGTTCAGAAATACGACATT		328	dub2-328	CCTTTACAATAAGTAGCAATAACCTTATCCAT
329	dub1-329	GGCGGGGCGATTGGGACATTGACGCCTGGCGG		329	dub2-329	TGCTCGCGAGCCTCGCGGGAGGAGAGCCGAGG
330	dub1-330	GTCGCAACCATGCATTTAAACCTCTGGTCAGA		330	dub2-330	CCGCTGGTGGCCGTTGACCATAAGTTACTCAT
331	dub1-331	TTAAACCCGGACACCGCGTGGGCCTTGAGGCC		331	dub2-331	TAAATTCCCGCGCCGCTCAGGTCTGATTTTTT
332	dub1-332	CGCTTTTCAGCGCGCCGCGGGTCGTGCGTTGA		332	dub2-332	ATTTACGGCGCGGTTCAGCGCGCGTAGTGGGC
333	dub1-333	CAAAGCTGAGCGGCGGGAGCAGCGGCTCGCCG		333	dub2-333	TGTGTAATGCTCTCTCAAAAGTGAAAGGCATT
334	dub1-334	GCCTCAGCCGCTATAACGGCGAACCGCTATCT		334	dub2-334	TGTTCACCCTGTTCACCCTTGCAATTTTTAAT
335	dub1-335	AGCTGAGTGTAAGCCAGTGGCTAAATAAATTT		335	dub2-335	CGGCTGAGCCGTGGGCGGGCGAAAATATTGAT
336	dub1-336	CAAAGAAACGCGCGCCGCGGTACTCGTCGAGC		336	dub2-336	CCAGATTTGAGGAGGTTTACGCCTTTTTACGC
337	dub1-337	GCGTGGGGCAAAGTGCGGCAGGTGAGCGGCAG		337	dub2-337	TAGGGGAATCGGACGCAAACTTGATAACGCGG
338	dub1-338	GCGCGGACGAAATAACCGACGTTTTCGAGTTC		338	dub2-338	GTTATTTATCCGACGTATACGTAACAAACAAG
339	dub1-339	CGCTGGTGGCGGTTAGCCAGGTGCGCGGGCAT		339	dub2-339	GATATTGCAGTTCGCGACTATCAGGAGCCTCA
340	dub1-340	ATAAGATAAATAAAAGCTAATCCCCCCTAGGG		340	dub2-340	TACACTTTTCACAGATAAGCGTAAATTCAGGG
341	dub1-341	TGGTGAGCGAGGCGCAGCGCGATCCGCAGCTG		341	dub2-341	TACCCTTTAAACGATACGTTTTCACCCAGGTT
342	dub1-342	CGTGGATTCATGCCAAAGACTGGCAGGAAAAC		342	dub2-342	TGATGTCGTGTTTTGGCTTTATTCCCGGAAAA
343	dub1-343	TTTGTGAGTTACTCAACGTAAGTCGCAAATCC		343	dub2-343	CATTACCCTGTCATTATTATGGACAGTATCGA
344	dub1-344	CCCGACCTGACCGGCGTAAAGACGGTAACAAC		344	dub2-344	CAGGGCACGACGCTGGCGGCAGTGTCACGCGC
345	dub1-345	TATTTCACCGTGCACCAATTCGCTTTATTCGT		345	dub2-345	CACAGGCCGCTTCACTGATGACATCAACAGCT
346	dub1-346	TCAGCAGGCTTACTTATCATTAACTTGCTCGG		346	dub2-346	GATTTGCGCGTAGTTGATAAACCCACGGCAGC
347	dub1-347	AGCCGGTCTGGCCGGAAATTCCGGCTTTTATT		347	dub2-347	TGGCGTGCTCGTCAATTGACGCCGCAAAAATA
348	dub1-348	GCTATCAAGTTCGAATCCATCAGGCAGCTGGC		348	dub2-348	TGAAACGGCTTGAGTTTTCGGTCAAACAGAGC
349	dub1-349	GCCCTTGGCGAACTGAAAAGTCTCGATGAGGC		349	dub2-349	CGCAGCGTGTTATCACCAACGGACGTGTTACG
350	dub1-350	ATGGAGATGAAGGACTCGGAAAAGCAGATTGC		350	dub2-350	GCGAGGGAATCAGAACCGGGCACCTGGCTGCA
351	dub1-351	CTGCAATCAAAAAATGAGCCCACACCCGAAGC		351	dub2-351	ATTGATGCCCGCTTTATTGCACTCGTTAATAA
352	dub1-352	CCAGCGTGATAACCGGCACCCCACGACCCGTA		352	dub2-352	CCGCGCTTATTCTCCGCACTCCAGCCCGCAAT
353	dub1-353	GTTTGTACGATTTCAAATATTCTGCTCATAGT		353	dub2-353	CGCTTTTTGTTGCTCTCCATAAAACATGGTTC
354	dub1-354	TCTGCACGTCGCCGGCGATCCGCTGGCCCCGA		354	dub2-354	AATACGAATTGTTACCTGCTCATTAATTTCGT
355	dub1-355	CGTCAACCACCTCGGCGGCGCTCGACAAGTCC		355	dub2-355	CCGAATCTGTTCTACAACAAATTCTTCGTAGG
356	dub1-356	CCACCTGATACGAGTCGGCACTACCGGCGACA		356	dub2-356	TTACCAGTGTTTGCTGGGGTGTCATTATGCAA
357	dub1-357	GACACGTACGACCCGACCGGCGACATTGACAG		357	dub2-357	CCCCAGTTCGTCATCTTCAATCTGGTCCCGGC
358	dub1-358	TGCAGCCGTAGCCGGCCGCCAGCTGCGATAGT		358	dub2-358	TAATAATATTGCTGTCAAATCTTTCTGGTGTA
359	dub1-359	GATCACAAATAGTCATTTCTATTTTTAGTAGTT		359	dub2-359	GCTGTTCGCAATGCTATGCTTCGCCTGGCAAA
360	dub1-360	GCGCAGGCGGTAGATTTGTTTCCCCGCGTCGC		360	dub2-360	AGGCCCTGGACTACTGGATCAGGGAGTACGCC
361	dub1-361	ATTTTTCGTGCTCTAAAACGCATCAATTTTCG		361	dub2-361	TGGCAGACCCCACGGTCTGCGCACGTATCTAT
362	dub1-362	GGAATCGCACGCCGTGCGAATTGCCGAGGCGCA		362	dub2-362	CGTGATGGCGGCGGCCACGTAGGGTTTGTAGT
363	dub1-363	GCGAGCGAAGAAGACCCCGCCCGTCCGCTGAA		363	dub2-363	GGGCTGAAAAACGGTGAGGTCTGCGTGTACAC
364	dub1-364	GTCTGAACATCCAGGTCGGTTATCTCGATTTC		364	dub2-364	GAACAATCAAAATGACCTACAAATTTTCTCAG
365	dub1-365	TCTCAATCATTTATACGTCTGTCAGAAGTTCA		365	dub2-365	TTTATATAAACGTCGAGTTTGCTCCGAAATCG
366	dub1-366	GGCAAAGCGACAGCCAGTGACTGCACCAAAACC		366	dub2-366	CGCTCGAAAGAAGGTCTCGAAGTGAAAATGCA
367	dub1-367	AGGTTTGCGAGGACGATCTTTAGAGTTAGCGG		367	dub2-367	CGATCGGCAAAAGCCAGGAGTACACCCTGCAG
368	dub1-368	CGCTGCGCGAGCGCGTGCCCGATTTCGGCGGG		368	dub2-368	CTGTCCTGGCAGATGCCGAGTGGAATTTTGCC
369	dub1-369	GAACTCGGCGCCGAAACCCCCGGACGATCCGCC		369	dub2-369	GTTTTGCTGTACCGCGCGCGCATAGCCGCATT
370	dub1-370	GATAATGTAAACGGAGCTATTGAGCTGGCTAA		370	dub2-370	AGCTGAACTTGTCTTTATCTATTCAGGAGAAT
371	dub1-371	AGCCCGCTCTTGAGCGGGGCGAGTGAGTGTTA		371	dub2-371	TCAGTGTCCCATCTTTCGACGTCGATTTGCGC
372	dub1-372	TAAAATTTTGTTTCCTGATTATACGCCATTGC		372	dub2-372	CCCCATCACCAGCGGGAATGACTGGGATTCA
373	dub1-373	CGCACCTACCTGTGTTGCGTACACAGCATCAG		373	dub2-373	TGATTTAATTGTCTCTTTTCTAAAAGACTCAA
374	dub1-374	GTGGTGGTCGGGGTTGCTGTCGCGCAGCCGAA		374	dub2-374	GGCACCGGTAATCCAGAGTGCGGCCAGCGCGT
375	dub1-375	TGTTCCCCCCGCTGGCGGGGATAACCGTTATT		375	dub2-375	AATTCTGACGTATCGCTGCGTAACGCTCTCGA
376	dub1-376	GCATACCGCGTTTTCACTGCCTTCGACATTTT		376	dub2-376	AGCCGTCGGTCGTGCGTTGCGAAATTGTGGTT
377	dub1-377	CCTTCGCACAGCCACGCCGTATCCGTACCGGT		377	dub2-377	CGAGCGCCAGAAACTTATGCGCTCATGAAAGA
378	dub1-378	AATCCTATTGTTCTTGGTATCCTGGCCGCTGC		378	dub2-378	AGCGCGCAGAGATTCGCAAGATGGATGCTGAC
379	dub1-379	TTACCTCACCAAAAAGATGCCCGTAAATATCC		379	dub2-379	GTTATTTACAACATTATCTAACTGTTTTATTT
380	dub1-380	TAAATCCACCCGAGCACCGCTAAACCCGTCTG		380	dub2-380	ACGGTGCCGCATGAACACAGCAAAACTGAAAG
381	dub1-381	TGATCGGCCTCGACAGAACGGTGCATTATAAA		381	dub2-381	AACGCCAGCGCCAGATATCAGCAGAGGGATGG
382	dub1-382	CTACGCGAGAAAATAACAAACACCGCCCGTAA		382	dub2-382	CAGCGCTCGACCGGTTCGCCAGCGGCAACGCA
383	dub1-383	CACGTGCATTTCGCGTGCATTTTTTTGTCTTA		383	dub2-383	TCTCGGAAATCATCTGGCGATAGCCAACGCCG
384	dub1-384	ATCGTAATCGTCGGCCAGCGATTTAGCGCCCT		384	dub2-384	CGTGGACCCTTTCCGCTTTTTTCATATTTCCG
385	dub1-385	GCAGCCAGGAGGCCGATAATTCCGCTTGATAGC		385	dub2-385	TTCTGCCACGCGACGCTCCGCAGGCCGCTCTA
386	dub1-386	TTGGACATTGTGCTGCCGACAGCAGGCATTGA		386	dub2-386	ATGCCAGGCGTGAGCACGCACCATTACGACCGC
387	dub1-387	CTCATCAACCTGGTGTGCAACGTCCTGTACGT		387	dub2-387	TTGCTTATTGAGGCGTTCGCGCAGGGACTCTG
388	dub1-388	GGCCCAGCGCGTTTTCGGCAAAAGATGTCGCC		388	dub2-388	CGCCATTACTACTGCATAGCGCCAAAATTTTT
389	dub1-389	TGGGGGACGCGTTTACCATTGCAGGTGTTTAC		389	dub2-389	AAATTGAACTGCGCCGCGTGGCTATTCACGGC
390	dub1-390	CGCAGAAGGTGCAGCAGTATCAACAGCAGCAG		390	dub2-390	ATGGCCATGACGTGAGCGCGGCCCTCGCTGAG
391	dub1-391	CACTTTTATAAAATTGTCGGTAATGAACTTAG		391	dub2-391	ATCGACAAAATCGTCGAGCTGCTGGCACAAAC
392	dub1-392	GCGTTAAACGCAGCGTTAACATTGCGCACTAA		392	dub2-392	GCTCTTCACCACTGTCAACGTAGACGATGCTC
393	dub1-393	TGTGGTCGCTGTCACGTTATTTGCGCCGTAAA		393	dub2-393	ATGGCGTCATCCGCTTCAAACCCGTGCTGGCC
394	dub1-394	CAGTTAAAGACCTGAGTGCGGCGTGCAAGATC		394	dub2-394	GAAATAAAATGCATGAAGGGAAAGATAAAAAA
395	dub1-395	GAGGGGTAGGCAGGCGGGCAAAGAAAACCCCGC		395	dub2-395	GTGACGGTCGCAGAGAGCGCCGCCGGGCTGCA
396	dub1-396	GCAGGAGCTAAAAATGGGCGCGTTGTTGATTA		396	dub2-396	CGCTGGTACGTATGGGTCTCGTTGATCTGAAG
397	dub1-397	GCTTTTGAAGGTCAGGCAGGCGTTGCTGAATT		397	dub2-397	TCCTTACACTTACTGACACCCATGAGCGTCAG
398	dub1-398	GGGATCTGGTGGGTTCGGGTTAACGTATTTTG		398	dub2-398	CTCGCAACGTGGCTGGGAAAAACCGTTCTGCC
399	dub1-399	CTCCAGATAGAGGCCGAGGAACCAGTAAATAA		399	dub2-399	ATCTGCGCGATCAGCTGGCGCAAAAAATTTAT
400	dub1-400	CGGGGTGTTGTCGTTCTCCAGCGCCTGCACCC		400	dub2-400	TGCGCAAAGAGCCGCTCGCCACCGCCGCGCCC
401	dub1-401	GGTCGCCGGCGTAAGCCCGCAATCGGTTAACG		401	dub2-401	CGTAGCTGGGTTGTTGTCTGCGTAGAGTCCAA
402	dub1-402	ATTTTTTTCCTCGATTGATTGATCAGGTGCGG		402	dub2-402	AGCATCGTCCCCGGATCCGCCTGGTCTGAATC
403	dub1-403	GATGCCACGACAACTGGTGATGAAGTGAAAGA		403	dub2-403	CCCACCTTTCCGCCGGACACCTTAGCGAACAC
404	dub1-404	GATCCGGCCGACCGGAAAATGAATTTTTAATT		404	dub2-404	GAACCTTGCTCTTGAAGGGATTACCAGCTTCT
405	dub1-405	CGGTTCGGCATCGCGGCAAATCCTTATCAATC		405	dub2-405	GTGGGGGATCCAGTATGAGCACAGTAACCCAT
406	dub1-406	TGGACCTGCTGACTGTTACTGTTCAGGCGATG		406	dub2-406	TGGGTAGGGTGGTTAACCGGCTTGCGGTTTGT
407	dub1-407	AGCAGTCGGCGGAAATGATGCGGGCCACGGCA		407	dub2-407	CGGAAATGTGGCAGGTTTTATTCTCACGGCAC
408	dub1-408	CAGGCGGTGAGCATGCCCTGGTACCGGAGGCC		408	dub2-408	TGGAATTACGCTGACCGGCCACGCACCGGTGA
409	dub1-409	GCATCTGGCGGCACTCTCACGCAGGCAAAGAG		409	dub2-409	AAGACGGCGACGTTCAGTTATTAGATATCGAA
410	dub1-410	ACAGGAGACGAAGACCTGTTCTGGTTAAATGG		410	dub2-410	CGCAGCAAATTAACGCTGTGGCGCCAGGAGGA
411	dub1-411	CCTCTTCGAACGTTACGTCAGGGAAATCACCA		411	dub2-411	AACACACTCATAAAGTTTATTGCGAGGGTGTG
412	dub1-412	GTAGACCGTTGCCTCAACGAAATACGCATTCA		412	dub2-412	CGCTAATTTACCGTTGGTGAGCGCGTCGCTCT
413	dub1-413	CTTCTACCTATTTGTAAAGGCGGAAATCTGTA		413	dub2-413	TAGCGTTGCCGATTGTTACGCGTTCCACTATT
414	dub1-414	ATTAATTGATGGATCACAAATAGTCATTTCTA		414	dub2-414	CAACCTCGCCCGACTCCAGTGATTTCATTCGG
415	dub1-415	ACAATATAAAAACACTATGCCTGAACAGGTTC		415	dub2-415	AGCTCAATCGACTGTTTTGACGACTACGAAGCC
416	dub1-416	TTCGCCAGTGCCTGGCTTGTGCCTAGTGCATA		416	dub2-416	GAATGCGTCGGTGGCGGGGGTTTCGGTTTTCC
417	dub1-417	TGCACCTGCACCTTCTGGTCTGTCGACAGCCA		417	dub2-417	AAACTGGTTGGAGATAGCTTCATTGGCTACAA
418	dub1-418	CCACCGTAGAAACTTAAGAGTCACTAACGGCA		418	dub2-418	GTGATAACCAGCTCTTTGTCTTCCAGTTGCCA
419	dub1-419	ACCGACGGCCAGTAATTGATTAAACGAGACGC		419	dub2-419	TAGAGGTTCTGCGACCGCGCCTGGCGTTTAAT
420	dub1-420	GAGTACGGCGGCGGATGGTGGCTGGGGAAAGC		420	dub2-420	GCACGGGAGGCAGCATGATTCCCGCCGCGTAT
421	dub1-421	TTTGCGCAGGGCTGCCACCCTGTCGCAGTGCT		421	dub2-421	AGGATTTGCAGGTTATCGAGGCGATGGGGTGG
422	dub1-422	TTATGTCGGAGGCAGCATGAGCGAAATAAACA		422	dub2-422	GCGTTTGTGGCGCGTAACGCCTGCTGCGAGGA
423	dub1-423	GAATAAAGTTTATGACAGTAATTAATAGATTTT		423	dub2-423	CCAGAACCGCTAACAATCGTTATCCCGAGCAC
424	dub1-424	TCAGGGGATCTGTTTGCGGACCAGCGTCATCA		424	dub2-424	AAACACTGGCTGAGCCTGGACCAGGCGGGCCG
425	dub1-425	CAAATTACGATTTGTGGCACGCGCGCAAACGC		425	dub2-425	CGATTGACCCGCAGCGCGCGCTTAACGTTGGT
426	dub1-426	GATGCATGCAGGGTCGTGATGTGCAGGGGCAG		426	dub2-426	CGTCTAAGGGGCGGGAATGAACTTCACCAGCT
427	dub1-427	GCCGTTGCAGCGTTGAGCACGGCCAGACGGCT		427	dub2-427	CCGCCCTGTGTTCCCCGCGAGAGCGGGGATAA
428	dub1-428	GCGTGCCGTCGCCTGTGCGCGACAACACATAC		428	dub2-428	CTGTCCGGTTCGGTATAAACCCGCACCAACGC
429	dub1-429	GCTTAGAAACGTTATTGTTTATATCGGAGAAA		429	dub2-429	GTCATCTCTAGCCCACTTGCTGTAATCGAGAC
430	dub1-430	CAGATGGCCGACAAGGCTATGCGGCAGCTTGA		430	dub2-430	GTTACTCGTATGACGAGATGCTGTCAGCAGCT
431	dub1-431	GGTAAACGAAGAATGCGCGTAATGAAAGCTCC		431	dub2-431	CCCTGGCCGCATAGAACTGGAACTGACCGGCG
432	dub1-432	CTATCATCAGTCACCCACAGACGAACAATCAA		432	dub2-432	AAGGTGCGGCAAACAGCATCGGACCTGTAACC
433	dub1-433	CAATGGTCTATGGCGCTATTCCATGCCAAATC		433	dub2-433	GAAATTCTGCGGCGTTATTTCGACGGCAAGCA
434	dub1-434	GTGCCACGGACGGTGTAAAAATGGCGGCCGGG		434	dub2-434	CTCTCCTTCTGATAAAAATAGCTCCAGAACAG
435	dub1-435	ATCACACGGCAGCCGGACGACACCACGCCCGC		435	dub2-435	ACGAATACGCGTCGTATAACGGCATGAACCGT
436	dub1-436	GCCCCCGCATTTTTCCCGCTAACCACCCTCGG		436	dub2-436	TACGGCTCGGTCTGAGTACGGGACGCCGCCGG
437	dub1-437	TTGATTTCCTATGTTGCGTTGAATGCAACACA		437	dub2-437	TGACCAGCTGCGGCTGTAGAGCGGTAGTGGCC
438	dub1-438	TTATTACGGTTGATGATTCGGATTTTCATATT		438	dub2-438	CCCTCTGCGTTTATGACGACGGGTGCGACTGG
439	dub1-439	CCTGCGCGCTGAGGACGTCAGCTGACGCAGAG		439	dub2-439	TTAACCAAATTATTCTGGCCGCTCATCAGGTG
440	dub1-440	GGCGGCTCAATATTCTGTTTAACCCCGCCGAA		440	dub2-440	TGGACACTATTTATTACAAGCCAGTGCAGGAA
441	dub1-441	CCCGAAATCTATTTTGATGGCTGGCGGTAAAT		441	dub2-441	TTTTGTGAGCTCGTTAAACAAAAGGCGTGCAC
442	dub1-442	CCAGCTCCCGCGCCCGGCACGTCCGCCTGGCC		442	dub2-442	GATTCACCGGAGCTTGATAGGTTGATTCAGCA
443	dub1-443	GCTGAACGTGAGCAGCGGGAAGCGCGTAAGCG		443	dub2-443	TATTCTGCCGTCTGCCCAGCCCACCGGGCCGC
444	dub1-444	CGTACAGGAAATTGCGGAGCGAGCTGGTAAAT		444	dub2-444	CTTGATTATGAACGGTTCAGCAACCTAATGAA
445	dub1-445	TTATGCCCAAAGCCTGGAATGCCTGGACGCCA		445	dub2-445	CGACTGCAAAAAAGCGCCGCCGGTGCCGTATT
446	dub1-446	CGCTTAGCGACGTTGATTTTATCGACCTGTAT		446	dub2-446	CGCGCGCGCAGCTCCTTCTGCACCCTCCTGCG
447	dub1-447	CTCACTGACAGAGTATTTCCGCGTTCCGGGAC		447	dub2-447	GGCTTTGGGTTTGCTGACGAGCGGCATCTCTG
448	dub1-448	CGAGTGCTGGCGTTCGGCATTGCATCAAGCAA		448	dub2-448	CAATTTGCGGTGCCGTTAACCAGGTTTTTTGA
449	dub1-449	CCAGAGTTGGTCAGAACTGCCGATTACAGCCG		449	dub2-449	CCCATCCCACGTTTTCATTGCTGACGCTGACG
450	dub1-450	CGGGCGATTTGAGCAGCGTTAAACTGTGGTAC		450	dub2-450	TGTCCCCGGCCATCAAAAAGAGCGGGTTGCGG
451	dub1-451	AGAGTCAATAGATAGTGAGAGAAAAAATTACC		451	dub2-451	GGAACCAACGTTAAGGTTGTAGCCTGGGTTAA
452	dub1-452	TTCATTAATTCAACAAAACAGCAAATAGCCGA		452	dub2-452	CATTGGATAGGCCTGGTCGATACTGTCCATAA
453	dub1-453	ATGTGACTATTGGTGACATTGCTCAAATTTGT		453	dub2-453	CGGCTGTTCATCCGCGCAACGTTGCGGGCTGA
454	dub1-454	CAGGTTTATAACGGCTGTAAAAATGCGAAAAA		454	dub2-454	AGCCTGCGCGAGTACGCGCGCAGGGATAAAAC
455	dub1-455	CGGTTTTTTATTACCAACAGAGGCACGTTCGG		455	dub2-455	TTTCCGGCGGTAGTGACGGTTATTTTCCCGGT
456	dub1-456	CCATCCATATGGCTGGTGTGGAGCGCGTCAAA		456	dub2-456	TCTTAAATTTCGCGATAGTCAATATATTCAGA
457	dub1-457	GGGTCAGAGCCTGTGGCGGATATTTCCAACGC		457	dub2-457	CATAAACAGGGCAATCAATACGGTAATTATCA
458	dub1-458	GGTGGTTACGTTCAGCTCAAGGCCAGTAGCTG		458	dub2-458	CGAGAAAAATAATGGCGCAGACTGCAGAGTCT
459	dub1-459	ACGCCGCAGCAGCGCAAATTACAGGGCAAGGG		459	dub2-459	AGGTGATTTGCGGCGTGCCAGCGCGCGCGGCC
460	dub1-460	ATCCCGCCGCCGAGTATTTTGCCCAACAGCCC		460	dub2-460	TTGAGACTGCTGCTTTAGCGCCTCAAGTTTCT
461	dub1-461	TAAATCAAGTTGGCGTGCTCGCGACCCTCGCG		461	dub2-461	GTTTTGTTGTATTGCTCTTGGCTAATCTTTTT
462	dub1-462	CAAGAACGCAACGTACTATTTTAATCTCGCGT		462	dub2-462	AGCAGATTCGAGTCTCCTATCGCGATACGGCC
463	dub1-463	GGTCGGCGATAAAGTGGCCAAATCGCTGGCTG		463	dub2-463	TAATTCCAGATGGTAATCACGCCACTCATGCG
464	dub1-464	GCCATGACACTTTCGACAGCGAATACCAGAAC		464	dub2-464	CTTATTCTGCCGTTCCGCCTGTCGCCCTGGGC
465	dub1-465	CGCTTGCCACAAATCATCGCCAGCGAAGACGG		465	dub2-465	CGCGACCGGCTTCATCGTGGGGTGGTCCGCGT
466	dub1-466	GGAGCGCCAGCGGGAGGGAATAAAGGTCGCTG		466	dub2-466	TTTTAGTTTTTTGCATGAATTACACCCCTTCT
467	dub1-467	CAACGCCGGGAGAGCGAGGCGCAGCGCCTGGC		467	dub2-467	GCGGCGATCTTGGATATATTGACGTTGGAAAA
468	dub1-468	TCGGCCGGCGTTGGCTTGTACATGTTTGCGGC		468	dub2-468	TCAGACATAAAGCCCCATCGGCGACCGTTGCA
469	dub1-469	GCTTCGATTTCGCGTTCATCGAAACCGGCTTG		469	dub2-469	GTTGTTACTCCCACCTTCGAGAAGATAGTCGT
470	dub1-470	ACTGGAGCTACAGCAGCAAAGTTGTCTATGCC		470	dub2-470	GGTGGCCAATCGCCCACGCTCCCAGCGCGGCC
471	dub1-471	GCTCGCCGATACGAAATTTACGGCGCGCTTCA		471	dub2-471	GGATTCTTTGCCGGGAATCCCTATCAAAAATG
472	dub1-472	TGGGCAAAAGCCGATGCAGGGCTCGTTCCCGT		472	dub2-472	TTCACTCCGCGTGGCATTCAGTGGGTAGCCGC
473	dub1-473	CTTTTTCAACGTTCGAACACTCGCCGTCGGCA		473	dub2-473	CCATACATCGATACAGAGGGCTACCCAACGGT
474	dub1-474	AACGCAGCAAAACTGAAAGCGGCGGCGCTGGC		474	dub2-474	GTTAGCGCCCTGGCTAATATGCAGCGTCGCGA
				475	dub2-475	CTCGCCGGGGCTAAAACCGGTCAGCGCCAAATC
				476	dub2-476	CCATTACCGCCATTAGCCAGTTGGGGTCGATG
				477	dub2-477	CCCAAAAACTGGGACAGGAAGCCCCGTGGTGT
				478	dub2-478	GCTGAAACTGCGCACTTTAGGTGATGAGAATT
				479	dub2-479	TTATGAGAATCACCGTGATGATGGTGAGCCAG
				480	dub2-480	CGCCCAGCGTTCAAGGTCTGTCACATTTCCGT
				481	dub2-481	GTAAAAAAGATAAACTGGTGACTAAAGGCGTA
				482	dub2-482	TGGAGATATAAGCCGCTGCCACCTGATTTTGA
				483	dub2-483	CCCTGCATTATGAATGCGCAGAGCGAGGTCTG
				484	dub2-484	GTGCTCGGCTTCCTGAACGCTGACATGTTCTAC
				485	dub2-485	CAATGCGCCGAGAAGTTATCAATCGCCTCGGT
				486	dub2-486	CTGGCCCGTCTGCGTCGGGCGGGCCGGGTCGGC
				487	dub2-487	CGGAGCGTCTCCAGCGTGAGGCGCAGGAAGAA
				488	dub2-488	GGATCGCGCCGATATTGTCTTTTTCTTTATCA
				489	dub2-489	CATAAACCCCGCTTCGCGCCATCCCAAAGACA
				490	dub2-490	GCCCACGCCTCTAAAGTGGCCGCCCTCGGCTGG
				491	dub2-491	CCTACCTGCTTTTGCTGCGGCGCGAGCAAAAT
				492	dub2-492	GACCCCGCAGCACCCACCCACCAGTCGTTCAA
				493	dub2-493	ACGACAGTGTGCTGACGCTCTGGGACGGTTCA
				494	dub2-494	CAATAACCAACTTAGCGAGTCCGGACGTCAGA
				495	dub2-495	TTGGCAGCTCAATCCGTATGATTTCGACGGCT
				496	dub2-496	CGACACATAGTAACACATTCACATATTAAATC
				497	dub2-497	TGCTCGACATGGGGCTAACTCTCGACCGCTCG
				498	dub2-498	GCGGGCTGGAAACGCGAGGATATTCTCGCTGT
				499	dub2-499	CTGCGCACCAATCGCCACAACCAGACGACGAA
				500	dub2-500	TTTGCAGACTCGTTAATATAGCTGTCGGTTTT
				501	dub2-501	AATTGCGTCAAACGCATTCATTCTCGTTATTG
				502	dub2-502	GTCGCGGAAACCTACCTCAACGGGCGCGGCAC
				503	dub2-503	TTCTTAAACAGATACGGCCAGACCAGCACGCG
				504	dub2-504	TTGCTTCAGCTCGCGTGCGCGCTTGATTGAAT
				505	dub2-505	CAGACCGAGAATATCTTGTTACCGAGATAGGC
				506	dub2-506	TGGGTGGATGTGGTGCATGCCGTCTACCCGAA
				507	dub2-507	GAAAGCAACAACAGAGAATAATTTGGGAAATA
				508	dub2-508	TAATCGGGCATGTGCGAGTTCGCGTACTGCTC
				509	dub2-509	GGAACGAGCAAATGGCATTAAGCACTGAAGAA
				510	dub2-510	CGTTACAAAATCAGATCAAAAACAGTTACCAG
				511	dub2-511	AGTGATCATGCTGCCTCCTTTTTTAGCGCTCT
				512	dub2-512	TGGATAGGCTGGAGTCCGGCATATGCGAAGAA
				513	dub2-513	GACTCGTTAGAGCAGGCCTCGCCAATGCTCGA
				514	dub2-514	TTTAGTGAGGCGGCGCAGGTGTGGGAACCTGT
				515	dub2-515	GTGCGCGCTTCATTTTTTATCTTCCCAGCTTG
				516	dub2-516	ACACCAGGCTGCATAAGATATTTTTCTATCTC
				517	dub2-517	GTTACGGTCCCAGCCCGCGCTCTTACGCGCAT
				518	dub2-518	GTTGTCAATATGGGGCTGAGTTGGCTGTGCGC
				519	dub2-519	CCTTTTGAGATGTTATCTGTCCTGAAAAAGAT
				520	dub2-520	TCAGTTCTTCTTCGTAAGCTCAACAAGGGCGA
				521	dub2-521	GAGTCTTTACCAGAAAGCCACCGGTTACAACT
				522	dub2-522	CCTTACCAAAGAGCAGCACGACTGGATCAACG
				523	dub2-523	AACCGCAACTCCTGCGCCACTGGCGTCAGATT
				524	dub2-524	CAGTTTTGCCTGCGCAACAAGGTGCCGGTAATT
				525	dub2-525	TGGTGCCAGTCGGCAATCGTCCGTAAAAATGA
				526	dub2-526	AGAAAATGCCGATTGAAAACCCGACCTATATA
				527	dub2-527	CACGCGGGTAGGGCAGACATCTTTCCCGGCTA
				528	dub2-528	AGGATACCATCCAGGGTGTTGTTTCTCAGCCT
				529	dub2-529	GTGTGTTTGTACCACTGGAGTCGTACGACATC
				530	dub2-530	CGCGCATACAGAAAGCGCGATTACACCAATAT
				531	dub2-531	CTGGAAAACTCCCGCTGACTATCGCTATTCAT
				532	dub2-532	TCCTGACGAGTGGAGCGCAGTAGGCGTTATCG
				533	dub2-533	CAGGCGCCGACCACTGTTGAAATGACCGTAAT
				534	dub2-534	TATTGCCGCCAGCAGGTGCGCCTGCTGATCGCC
				535	dub2-535	AGATTTTTTTTACCGTGGCAATTTTGCGCATC
				536	dub2-536	GATTAATTTATCCGCCTCAAGCATCAGGTGAA
				537	dub2-537	TTCGTTGAGAAAAACCCCGAAGCAGTCAGGAC
				538	dub2-538	GGCCGCAACGATCAGCACGTGACGCTTGTCGG
				539	dub2-539	TATTTCGATGATGATTGCTATCCACAGGAGTC
				540	dub2-540	TGATGTGCGCTTACTGTCTCTTGTCTGGAATG
				541	dub2-541	TGGCAATACATGCCTGTTTGACGGCGGCGGTA
				542	dub2-542	CACGTATATGTATATTAATCGCCGTCATTATA
				543	dub2-543	GTCTTATCGCGCCGTATGCGGCCAATAACAAC
				544	dub2-544	AAACGCACCCGTTACGACGAATATATTGAATT
				545	dub2-545	CTAAGAACGCGCAGATTGCGGAGCTTTTAGAG
				546	dub2-546	CTATCATCTACCACATCAACCATAACAAATAT
				547	dub2-547	CGGAAACGCTATATTTCCGCGCCTTACGCCCC
				548	dub2-548	TTGTATGTCGCTGGCCGGCGCGTTTAATACGT
				549	dub2-549	CATTTATTATTGAAAATGAAAAATTAATAGCC
				550	dub2-550	CCATGCGCCAAACTTCTGGCGCTGGCTACAAC
				551	dub2-551	CGCAATGCAGAGTTGGAGGGGCAACTTGAAGT
				552	dub2-552	GCGCTGGCCTGGCGTCATTTTGTGGACACGGT
				553	dub2-553	CAAAGTGAGAAGTTATAGACTGCCGCACAGGC
				554	dub2-554	AACGCTGTCCGATATTTCCGGCGGCCAGTGGC
				555	dub2-555	CAGCCTCCAAACGTTCAGCTACCCGAGGATTC
				556	dub2-556	AGATTTGGCTTGATGCAGCAAACAAAGAACTT
				557	dub2-557	GGGACTAAGAGTGATGGGGCTGATTTTGAGCGG
				558	dub2-558	CAATAGATGACATTCCCGCTCGTCTGGAAAGA
				559	dub2-559	ATCGTGATTTCCGGGCGCTATTACGTCAGATC
				560	dub2-560	CCCCTTCTGAACCGCAGTTAGTGGGATAACGC
				561	dub2-561	TGACAGGGGCGTTTAGCCTGGCCGAAGCCGAG
				562	dub2-562	AGCTGGCCCGCGCATCTTTACAGGATCGCAAT
				563	dub2-563	TTTGTCGGTAGCGCCAATGTAACGCCGTTCAG
				564	dub2-564	CGCGATATACGTTCGCGTCAGCCATTTTAATT
				565	dub2-565	GCATTGCGCGATAAGGCGCTCCAGGCATACAC
				566	dub2-566	TTCATTATATTGCGCTGAACGCCGCTTTAACG
				567	dub2-567	AACACAGCAAAACTGACAGCGCTTCGCGAGCA
				568	dub2-568	AGCTTTTCGGGATTATTTACACGATAGACGAC
				569	dub2-569	CTCACAAGGAGGTGAATTTTGAAAATCGAACA
				570	dub2-570	GCCGCCATGCTGGACGTGGTACTCCCGACAGC
				571	dub2-571	AGTTCGGGGTTGACCTGTGAGTATCACAGCGA
				572	dub2-572	TGGCAGTTCTGCCGTTTCCAGTGCCGGCGGGA
				573	dub2-573	CGGGCCATCTTTCAGGCTCGTCCAGTCGCCGC
				574	dub2-574	ATCTGGATAGAGATAAGAAACGGCAGTATTGC
				575	dub2-575	TGAGATAGCTACAGATCCGTTCGTTATCCTGC
				576	dub2-576	TCAGCGGGGATGGTTTATGACGGACTTGCGCC
				577	dub2-577	CGGGGTGTTCCGGCGTTGCGCAGTTATCAGGC
				578	dub2-578	GCTCCCAGCAATATAAGGACCTTGCAAACCAG
				579	dub2-579	CGATCTGTCCCGCGCGGATTTTGAGGGTATTT
				580	dub2-580	GCGGCTCAGGGAGCGGTTGCCAGTGGGTAGCC
				581	dub2-581	CGCACCACACTTCGCCGTCTTCTTTGGTTGCC
				582	dub2-582	CGTTCTCAACCGGGGACAGTCTTTTGTTAAGG
				583	dub2-583	CTCAGGCTTTGCGCCTCAAGCGCTTCGGTGTA
				584	dub2-584	CAAAAGAGTTATTGTTTAATAGTCAGCACGCC
				585	dub2-585	ACGGCACAAATAAACAACTCGACTGGCAACTA
				586	dub2-586	TGCAGTGAGCGGATGCCGCCTGAATGCACCAT
				587	dub2-587	CCACCGTTGTGACCGTACCAATGGACAGTGAG
				588	dub2-588	TGACCAGTGGCGGACGCTTTGACCATCTCTGGA
				589	dub2-589	TATGAGGCGGGATATATTTCATATTTTCTGTG
				590	dub2-590	GCAACGGCTCATTCTCTTGGGGTCGAACCATT
				591	dub2-591	GCGGGTTATTTACTGGGAAATGAATAAGGAAA
				592	dub2-592	TTAACCTGGCGCGCGAGCGCGCTGGCGCTGAA
				593	dub2-593	CATTTTGCAGTAGTTAACTACAGCGCGGACAA
				594	dub2-594	ACCTCGGCGGGCAGCACGTCGGGTATCTCGGT
				595	dub2-595	CGCGCATCAGGAAATCACAAACCAGCTCTACA
				596	dub2-596	CAGGGGGCGAAAATCGCCCGTTCTGGCTGGAA
				597	dub2-597	AGATCACTGCCGAGGAAAATATTTAGTTTTCC
				598	dub2-598	TAGACTGTGTCTGCATATCCACCGGCACGGCG
				599	dub2-599	ACTGGCGGCCACGTGCGCAAGACCAGTAAGCG
				600	dub2-600	GATGAGGAAACCTGGATGACAGGCGCTGAAGC
				601	dub2-601	GGCTGTTTTCGTTTTATCCGGCGTAACCGGAT
				602	dub2-602	GTCGCATTCGGGGCAGGCGCACTCACGATCCG
				603	dub2-603	CCATTGAAAACTGTGGCTGCTCTCCGCCACGG
				604	dub2-604	AAAATTGAAGAGCATACACCGCAATTTATACT
				605	dub2-605	ACTGACACAGCAAAACTGAAAGCGGCGGCTGA
				606	dub2-606	CGCGCCGCATCACGTGCAGGACACGTAAAACT
				607	dub2-607	AAACCTTCAGCGCTACCGCCGGATATTTTTTC
				608	dub2-608	CACTTACGGTGGCCCGGTCGCTGATATGCCGC
				609	dub2-609	CAGTTTGGGCATATTCGCCGCAACGTTATCCA
				610	dub2-610	TTTACAACGGTTGTAAAAACGCAAAAAAATCA
				611	dub2-611	GAATTTATTCTGTTATAACGGGGGTGTGGCCG
				612	dub2-612	CGCCCTGCTTCATTACGTGCCGGATCTGCACC
				613	dub2-613	CAGGCAAATAACAAAAAACCCCGCCGGAGCGG
				614	dub2-614	GACTGATAGAGATGACCGTAACGATAAGGGCG
				615	dub2-615	GTGCGCCGCTACAACCGCACTACCCACCCTGA
				616	dub2-616	TCAGTTGCGAGGCTCATTTTATCCTCTACCCG
				617	dub2-617	CGACCTGAGCCTCCACCAAAACCAGACGAAGA
				618	dub2-618	GATCTCGCGGTAGTCGATTTCCGCACCGTCAG
				619	dub2-619	GCCCGCGCCTTGCGCCCGCCCAGCACAATGTG
				620	dub2-620	ATTAATGAGCTGGTGAGCAACACAGGTTCAGC
				621	dub2-621	CTATCTGGGAGGCGTGGCTATCAATGACTCAA
				622	dub2-622	CTTGCTGCTGCTTACGGAGTGTCTATTGCGTG
				623	dub2-623	TGATCGAAATGCTCGAGGGCATCGTTCCGAAC
				624	dub2-624	CTCCGATCGTCTTCAGTAGCAATGGACACGCA
				625	dub2-625	AGGGTGGAGTTGTTCATTTTGCGTTCCTTACA
				626	dub2-626	GAATCCCAATCAAGGAATTCATGGTCAGCAAC
				627	dub2-627	AAATCGTTGCTGCTGACGCGCTCAACTTTAAC
				628	dub2-628	CGCAATCGATAGTCACCGGCGCGTTAAAGTGC
				629	dub2-629	AAACGCTGCTGCCGCGGTCAGATAGTCAATAT
				630	dub2-630	GCGCGCCGTTACGAGATATACGGCGCGCTTCA
				631	dub2-631	ATCTCGCCATCGATGGCCCGACGAAACATTTC
				632	dub2-632	AGCGGGCGCTTATCCACACACTGATAAGGCGC
				633	dub2-633	CCCATACAGCCTACTGCGCCGGCGGGCAGAGA
				634	dub2-634	TGTGACCGGTGTTTCGCGCGCGTGGGTGTACC
				635	dub2-635	TAGAATCGCCAGTCACCCATACCCTCACTTGG
				636	dub2-636	CGGGCAAACGACTAACGAGGGAATTAATTGCT
				637	dub2-637	CGAATCATCCTGGTATTCGACGAGGCGTCAAA
				638	dub2-638	GGCGCTATCACTACTTGCATCCGCAAACTCTT
				639	dub2-639	TCAGCAAAGACACAGTAACAAACGTTAAAAAG
				640	dub2-640	TTCCAGTGCCTCCCAGGCTGGCTGGACACAGA
				641	dub2-641	TGGGGCGAGCTCTCACTCAAACTAACCACCGG
				642	dub2-642	AAAAAATAGCGCGAGAACTGGGTATGGATGCT
				643	dub2-643	GGCGAGTATGACGCTAAAAGGCCTCGTCGCTG
				644	dub2-644	CTACGTCAGTGGTTAATTTGCCCTCTGCGGCC
				645	dub2-645	ACGCAATGAGCATTTGCGGCCGGTGGATGTAC
				646	dub2-646	CCCACCACGCAGACCTCGTTAGTCGGGCTGGC
				647	dub2-647	GGGCTGCGCGCCGCAAAGGCCTTGATTGGCAG
				648	dub2-648	GGCGACCAGCAGACAACGGGTATCAGTACCGC
				649	dub2-649	GAAGCGTATCGGCAGCGCCAGTTATCCGGCAG
				650	dub2-650	GCCATAATCAGCGCGACGGCACCGTCGATTTT
				651	dub2-651	GTAGCGTTCTCCGCCGACGTGGGGTACTTGCT
				652	dub2-652	CGAGCTGTTGAGTTTTACGAGCAGGTTAAGCA
				653	dub2-653	ATACGGCTGTTCGCCGCCTCACCCCTGTGGAG
				654	dub2-654	CGACGCCGGGGCCGTGGACTCACGACGGATGC
				655	dub2-655	GCTCCGATTGGGCTACTTCTCAGGCCATTTCG
				656	dub2-656	CAGCGCCAATGCAGGCAAGAGCAATGATTGGT
				657	dub2-657	CGGAGCCACTCGTCAAACGTGAGGCGCTCAGT
				658	dub2-658	CTCGCAGAATCGTTAAACGGCGACACCAGGAA
				659	dub2-659	AATACCTGTCTTTACGCAAGCATCTGATAGGT
				660	dub2-660	ACCGAGAGATATTATTTCTTGGACTGGAAAAT
				661	dub2-661	GAAATTCAAGGTCAACCGTGCCTTCTTCGGCGT
				662	dub2-662	GCCGAGGCCACCGCCGCGGGCGGCGTGCTGCG
				663	dub2-663	TCCTGGCCCATTTGTTTAAACTGCTCAGGGGT
				664	dub2-664	TAGCCCAGGAATATCAGGAAGCCATTGACGCT
				665	dub2-665	TGCTCCAGCTCTATTACGGACTGTGCGAACGT
				666	dub2-666	GCGGTTGTAAATACTGACTGGGGTCAGCCCTA
				667	dub2-667	CACCAGATCCCCGTCGGCGTCGTCAAAGGCCA
				668	dub2-668	CACGTGCATTTCGCGTGCATTTTTTTGTCTTA
				669	dub2-669	TTTTTTGTGACCAGGTTTATTTGGTCGTGTGT
				670	dub2-670	ACGGCGGCGCTTGCGGTTCACGACCACGGATA
				671	dub2-671	AGTGGGCTCATTTTTACCGTCGTTCTTTTTTT
				672	dub2-672	AAAATGACAATGAGCCCGGATGAGGTTCTACA
				673	dub2-673	AAACCCCAGCCACCGACGCCTTCATCGCAGAG
				674	dub2-674	GCAGTTAGAGCCGTGGGCACCATGTCCGCGGT
				675	dub2-675	TGCCGAGGCAAAGGGTGCCGCGCGCGTCGAGC
				676	dub2-676	TACGCGGCGGGCGGCGCAACGTGAAGTTGCGT
				677	dub2-677	CTGGCACTCGCTGTCACAAAAGCTATTCACCT
				678	dub2-678	GTTTGTGGTCGTTGTAAAGGCACAGGCCTGCG
				679	dub2-679	GCGCGCTGCGTGGCGTCAGCCAGTTCAAGCAT
				680	dub2-680	TCATAAACAGACTGCATATAACGCGGGTAATC
				681	dub2-681	GATTTACGAACGGCAACCCCCAGGGCGGTGTG
				682	dub2-682	TTTGGGGTCGCGAAGAGCAGCAGGCATTTTTG
				683	dub2-683	CGTGAGTGAAATAAGCAAAGAGCAGATTATTT
				684	dub2-684	CCCAAAGGCTGTTCTCTGCCTGATAGCAGCGT
				685	dub2-685	AGATCGAGACGTCGTATTCTCTCGATAGCTTG
				686	dub2-686	AGCAACATCGACACAGCAAAACTGAAAGCGGC
				687	dub2-687	CGTATCACTTCGTCTTCGTGACCGGCTTCATA
				688	dub2-688	CATTGTTTTTGCGTGGGTCGACGAGCAGTTGC
				689	dub2-689	GCTTTCGGCGAGGTCGTTGAACTGCTGCCACT
				690	dub2-690	TCCAGCCCGGACAGGACACGCCAGCTATTCGG
				691	dub2-691	GCACCGGCCTGGGCAATCACCCGGAGCTGGTG
				692	dub2-692	GGCGCAGCCCGGACGTTGAGCCTTTCTATGAG
				693	dub2-693	CTGGATAGCGAACTCCGCGTGGGCGCAATGGT
				694	dub2-694	ACGATGAGGATGCTGTCAGAACCGTGATGTTC
				695	dub2-695	GACTATCACAACTGCCACCGCCAACGACTACA
				696	dub2-696	ATGTTAGCGCGAGTTAGTGGTGGTAATTCTGG
				697	dub2-697	ATTCTCAATGGAGCGGTAGTCTGCGCGTATAT
				698	dub2-698	CGTCAGCGTGAGCTTGAGCAAAGGATGGAAGC
				699	dub2-699	AATAGTAAGACGTTACTATATAAGGCGGGTGT
				700	dub2-700	CTTTCGTGCCCAATACGTGCGGGCGAAGGAGG
				701	dub2-701	TTATATGGACCAGACTCAACAAGTAGAGCAGT
				702	dub2-702	GCAACACGGGCCTCGCAACTGGTATCAACATT
				703	dub2-703	CGCCTCTAAATTGCAATAGGCGCCCGTCTTGA
				704	dub2-704	TGACTGATTCTGGTTTTGTCCCTGGCTGGAGG
				705	dub2-705	CCCGCCTCCGGCCCCTCAATTTCGTGGTTCAT
				706	dub2-706	CCTAACCGCTGCAACCACCGCCGAACTAAAAG
				707	dub2-707	TGCCGGTTTTAAGGACAGCCAGGCCGCCGACA
				708	dub2-708	ATTCTGGCTTTACTGCCAGCGGCCCCGCACGG
				709	dub2-709	CCTGAACCCGTCCGAAAAACGGCAAAACGGGT
				710	dub2-710	ATTCGCATTATCACGTCATCACCCGTTTCGCT
				711	dub2-711	TGGTATCCGCACATCGTCGAATCCATGAACAC
				712	dub2-712	CCAGACATGGCGCGGCCTGGGCTGTTGATATC
				713	dub2-713	TTACTCTATGAACGGCGGCGAACAAGGACGAA
				714	dub2-714	TCACGCAACTTTGGTTTCCCAGGCCTCGTGTC
				715	dub2-715	TGCGTAGGGTTCAAATTGGGGGGGATAACTGA
				716	dub2-716	AAGTTGGTTTGATGCCGTCTAATACCGGTTTG
				717	dub2-717	GGTTGAACGGCTTGAGGCTGATAACGAGCCAC
				718	dub2-718	AAAATGCCGACGGCAGTAACAATCACTATCAG
				719	dub2-719	CAGGAGCATCCAAACCTTTCGCTGATTCTTGC
				720	dub2-720	CACGTCTTCACGGCAGCGCTTAAAGGGCAACG
				721	dub2-721	CTGCCGAGGTAACTTAATAGTCACTAACGGCA
				722	dub2-722	TTTTCGATGTTACTTGCAGTGCTGGAATGGGG
				723	dub2-723	TACCGTCATCGCCGACTGGCTGCTCATTGAAG
				724	dub2-724	CTTGGCATCCCATCATTCCTTATTATCATACT
				725	dub2-725	AGCCTACTGCAGAGAAAATGCAAGCCGCAGCT
				726	dub2-726	CATCCCCCTGAATGTGAGCATCGGAATCGAGC
				727	dub2-727	CTATCTTATGTGTTTATACAGTGATGGTTTCT
				728	dub2-728	AGAATAACAACAATCCGTTAAGTGAAGAAGAA
